# Supplementary material for: DyIII single-molecule magnets from ligands incorporating both amine and acylhydrazine Schiff base groups: the centrosymmetric {Dy2} displaying dual magnetic relaxation behaviors
Source: Royal Society of Chemistry journal article supplement (doi:10.1039/c9dt04434e), 2020-01-01
Supplement: c9dt04434e1.pdf [file c9dt04434e1.pdf]

# Dy<sup>III</sup> single-molecule magnets from ligands incorporating both amine and acylhydrazine Schiff base groups: the centrosymmetric {Dy<sub>2</sub>} displaying dual magnetic relaxation behaviors

Sen-Da Su,<sup>a</sup> Jia-Xin Li,<sup>b</sup> Fan Xu,<sup>a</sup> Chen-Xiao Wang,<sup>a</sup> Kai Wang,<sup>\*a</sup> Yan Li,<sup>a</sup> Shu-Hua Zhang,<sup>a</sup> Xiu-Qing Zhang,<sup>a</sup> Yi-Quan Zhang<sup>\*b</sup> and Fu-Pei Liang<sup>\*a</sup>

## Table of contents:

1. **Figure S1.** IR spectrum of **1-3**, free Hpphz and H<sub>3</sub>aahz ligands.
2. **Figure S2.** TG curves of **1-3**.
3. **Figure S3.** The PXRD patterns of **1-3**.
4. **Figure S4.** Molecular structure (a), [Dy<sub>2</sub>(OAc)<sub>2</sub>] core (b) and coordination geometry of the Dy<sup>III</sup> ions of **2**.
5. **Table S1.** CShM values calculated by SHAPE for Dy<sup>III</sup> ions in **1**.
6. **Table S2.** CShM values calculated by SHAPE for Dy<sup>III</sup> ions in **2**.
7. **Figure S5.** Two discrete {Dy<sub>6</sub>} clusters in molecular structure of **3**.
8. **Table S3.** CShM values calculated by SHAPE for Dy<sup>III</sup> ions in **3**.
9. **Figure S6.** The plots of  $M-HT^{-1}$  of **1-3**.
10. **Figure S7.** Frequency-dependent  $\chi'$  ac susceptibilities of **1-2** under zero and 1.0 kOe fields.
11. **Table S4.** The best fitting parameters of **1** from of ac data under zero applied dc field.

---

<sup>a</sup>Guangxi Key Laboratory of Electrochemical and Magnetochemical Functional Materials, College of Chemistry and Bioengineering, Guilin University of Technology, Guilin, 541004, China.

E-mail: [fliangoffice@yahoo.com](mailto:fliangoffice@yahoo.com); [kaiwang2011@yahoo.com](mailto:kaiwang2011@yahoo.com)

<sup>b</sup>Jiangsu Key Lab for NSLSCS, School of Physical Science and Technology, Nanjing Normal University, Nanjing 210023, China. E-mail: [zhangyiquan@njnu.edu.cn](mailto:zhangyiquan@njnu.edu.cn)

12. **Table S5.** The best fitting parameters of **2** from of ac data under zero applied dc field.
13. **Figure S8.** Frequency-dependent  $\chi''$  for **1-2** at 2 K under different dc fields.
14. **Table S6.** The best fitting parameters of **1** from of ac data under 1.0 kOe applied dc field.
15. **Table S7.** The best fitting parameters of **2** from of ac data under 1.0 kOe applied dc field.
16. **Figure S9.** Frequency-dependent  $\chi'$  ac susceptibilities of **1@Y** and **2@Y** under zero and 0.4 kOe fields.
17. **Table S8.** The best fitting parameters of **1@Y** from of ac data under zero applied dc field.
18. **Table S9.** The best fitting parameters of **2@Y** from of ac data under zero applied dc field.
19. **Figure S10.** Frequency-dependent  $\chi''$  for **1-2** at 2 K under different dc fields.
20. **Table S10.** The best fitting parameters of **1@Y** from of ac data under 0.4 kOe applied dc field.
21. **Table S11.** The best fitting parameters of **2@Y** from of ac data under 0.4 kOe applied dc field.
22. **Figure S11.** Frequency-dependent  $\chi'$  ac susceptibilities of **3** under zero and 2.0 kOe field.
23. **Table S12.** The best fitting parameters of **3** from of ac data under zero applied dc field.
24. **Figure S12.** Frequency-dependent  $\chi''$  for **3** at 2 K under different dc fields.
25. **Table S13.** The best fitting parameters of **3** from of ac data under 2.0 kOe applied dc field.
26. **Computational details**
27. **Figure S13.** Calculated model structures of **Dy1** fragments in **1-3**; H atoms are omitted.
28. **Table S14.** Calculated energy levels ( $\text{cm}^{-1}$ ), **g** ( $g_x, g_y, g_z$ ) tensors and predominant  $m_J$  values of the lowest eight Kramers doublets (KDs) of individual  $\text{Dy}^{\text{III}}$  fragments for **1-3** using CASSCF/RASSI-SO with MOLCAS 8.4.
29. **Table S15.** Wave functions with definite projection of the total moment  $|m_J\rangle$  for the lowest two KDs of individual  $\text{Dy}^{\text{III}}$  fragments for **1-3** using CASSCF/RASSI-SO with MOLCAS 8.4.
30. **Figure S14.** Magnetization blocking barriers for individual  $\text{Dy}^{\text{III}}$  fragments in **1-3**.

31. **Figure S15.** Calculated (red solid line) and experimental (black circle dot) data of magnetic susceptibilities of **1** (left) and **2** (right).
32. **Table S16.** Relevant parameters for the calculation of intermolecular magnetic interactions of **1** and **2**.
33. **Table S17.** Exchange energies  $E$  ( $\text{cm}^{-1}$ ), the energy difference between each exchange doublets  $\Delta_t$  ( $\text{cm}^{-1}$ ) and the main values of the  $g_z$  for the lowest two exchange doublets of **1–2**.
34. **Figure S16.** Calculated orientations of the local main magnetic axes on  $\text{Dy}^{\text{III}}$  ions of **1** (left) and **2** (right) in the ground KDs
35. **References**
36. **Scheme S1.** Synthetic route of the Hpphz and H<sub>3</sub>sshz ligands.
37. **Figure S17.** <sup>1</sup>H NMR of the Hpphz (top) and H<sub>3</sub>sshz (down) ligands.
38. **Table S18.**  $\text{Dy}^{\text{III}}$  and  $\text{Y}^{\text{III}}$  ion contents of **1@Y** and **2@Y** determined by energy dispersive spectroscope (EDS) of field-emission scanning electron microscope.
39. **Table S19.** Crystal data and structure refinement parameters for **1-3**.
40. **Figure S18.** Perspective ORTEP drawing of **1** (the hydrogen atoms were omitted for clarity).
41. **Figure S19.** Perspective ORTEP drawing of **2** (the hydrogen atoms were omitted for clarity).
42. **Figure S20.** Perspective ORTEP drawing of **3** (the hydrogen atoms were omitted for clarity).
43. **Table S20.** Selected bond lengths ( $\text{\AA}$ ) and angles ( $^\circ$ ) for **1**.
44. **Table S21.** Selected bond lengths ( $\text{\AA}$ ) and angles ( $^\circ$ ) for **2**.
45. **Table S22.** Selected bond lengths ( $\text{\AA}$ ) and angles ( $^\circ$ ) for **3**.

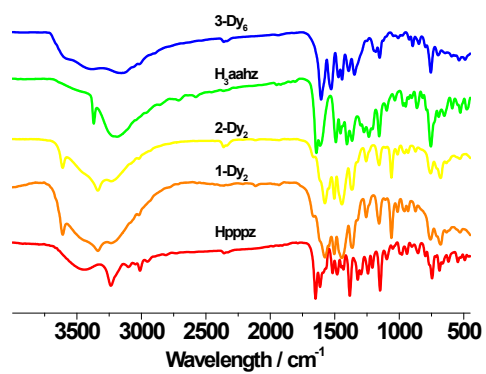

Figure S1. IR spectrum of 1-3, free Hpppz and H<sub>3</sub>aahz ligands.

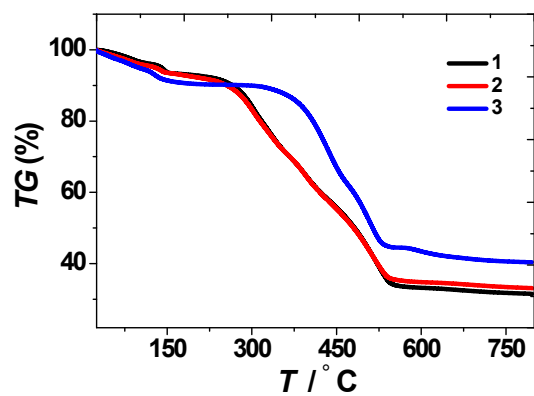

Figure S2. TG curves of 1-3.

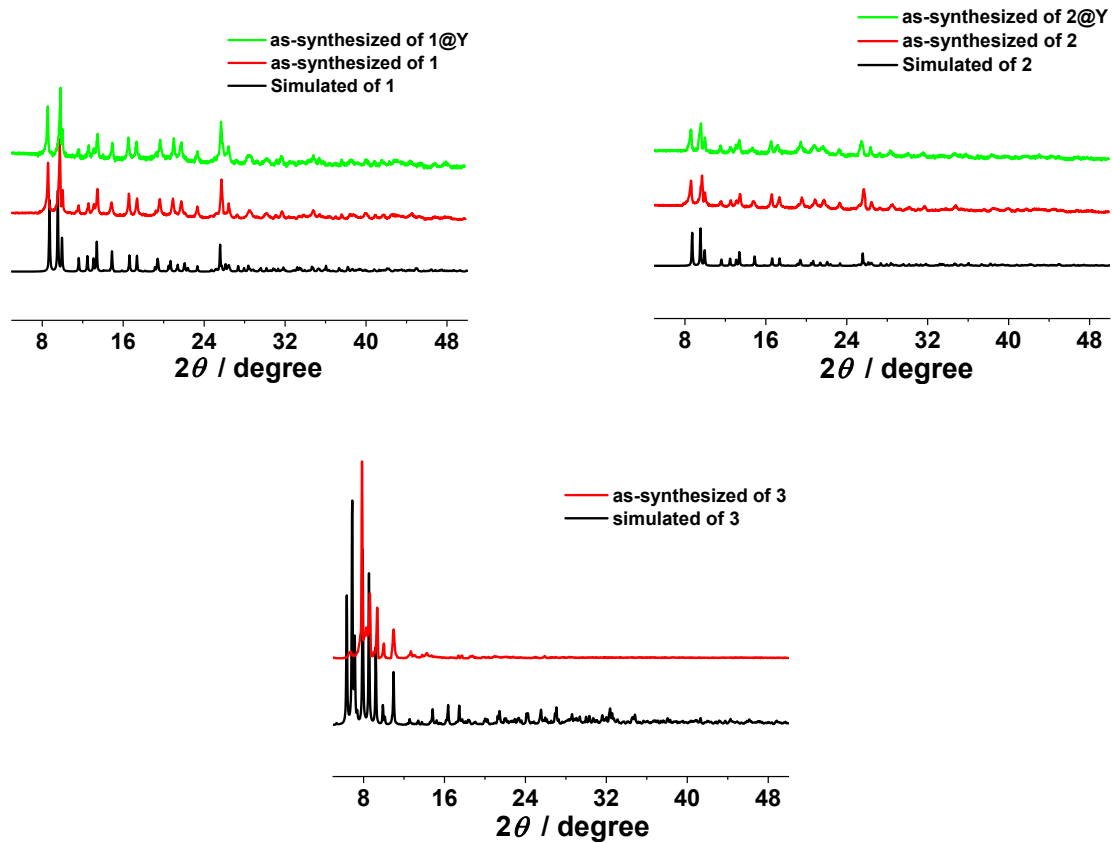

Figure S3. The PXRD patterns of 1-3.

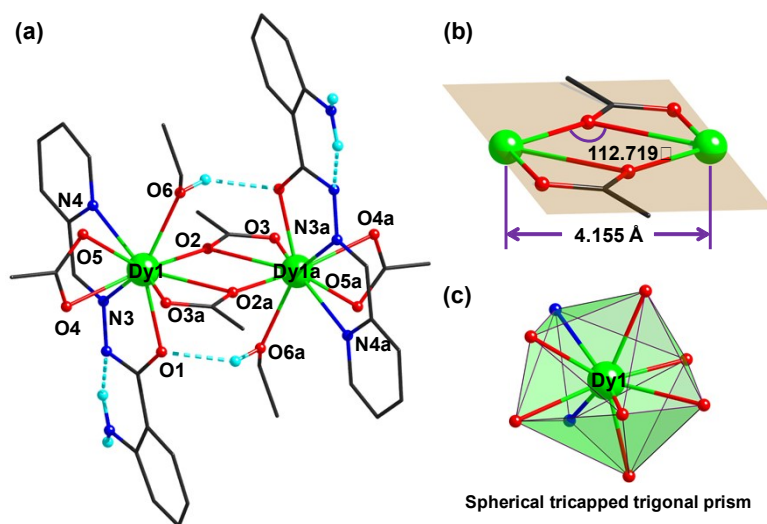

**Figure S4.** Molecular structure (a),  $[Dy_2(OAc)_2]$  core (b) and coordination geometry of the  $Dy^{III}$  ions of **2**.

**Table S1.** CShM values calculated by SHAPE for  $Dy^{III}$  ions in **1**.

| Configurations                           | Symmetry                   | CShM values  |
|------------------------------------------|----------------------------|--------------|
| Enneagon                                 | $D_{9h}$                   | 33.472       |
| Octagonal pyramid                        | $C_{8v}$                   | 23.540       |
| Heptagonal bipyramid                     | $D_{7h}$                   | 18.131       |
| Johnson triangular cupola J3             | $C_{3v}$                   | 12.651       |
| Capped cube J8                           | $C_{4v}$                   | 9.347        |
| Spherical-relaxed capped cube            | $C_{4v}$                   | 8.697        |
| Capped square antiprism J10              | $C_{4v}$                   | 2.660        |
| <b>Spherical capped square antiprism</b> | <b><math>C_{4v}</math></b> | <b>2.288</b> |
| Tricapped trigonal prism J51             | $D_{3h}$                   | 2.891        |
| Spherical tricapped trigonal prism       | <b><math>D_{3h}</math></b> | 2.308        |
| Tridiminished icosahedron J63            | $C_{3v}$                   | 11.248       |

**Table S2.** CShM values calculated by SHAPE for  $Dy^{III}$  ions in **2**.

| Configurations                      | Symmetry                   | CShM values  |
|-------------------------------------|----------------------------|--------------|
| Enneagon                            | $D_{9h}$                   | 33.391       |
| Octagonal pyramid                   | $C_{8v}$                   | 23.328       |
| Heptagonal bipyramid                | $D_{7h}$                   | 17.990       |
| Johnson triangular cupola J3        | $C_{3v}$                   | 12.637       |
| Capped cube J8                      | $C_{4v}$                   | 9.345        |
| Spherical-relaxed capped cube       | $C_{4v}$                   | 8.636        |
| Capped square antiprism J10         | $C_{4v}$                   | 2.736        |
| Spherical capped square             | $C_{4v}$                   | 2.400        |
| Tricapped trigonal prism J51        | $D_{3h}$                   | 2.905        |
| <b>Spherical tricapped trigonal</b> | <b><math>D_{3h}</math></b> | <b>2.359</b> |
| Tridiminished icosahedron J63       | $C_{3v}$                   | 11.281       |

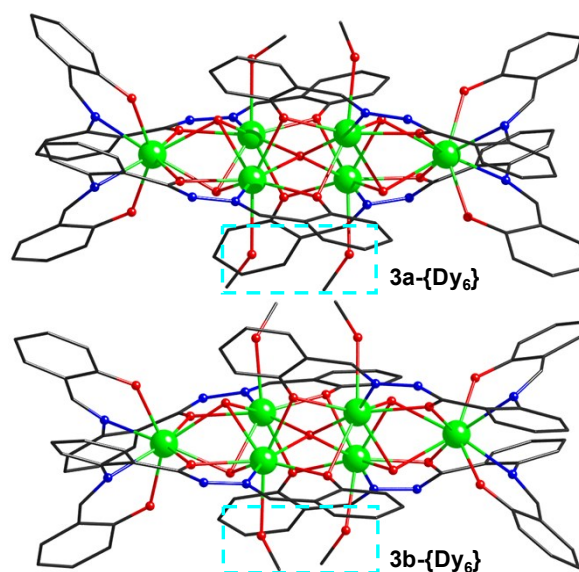

**Figure S5.** Two discrete  $\{Dy_6\}$  clusters in molecular structure of **3**.

**Table S3.** CShM values calculated by SHAPE for  $Dy^{III}$  ions in **3**.

| Configurations                             | Symmetry | CShM values  |              |              |              |              |              |
|--------------------------------------------|----------|--------------|--------------|--------------|--------------|--------------|--------------|
|                                            |          | Dy1          | Dy2          | Dy3          | Dy4          | Dy5          | Dy6          |
| Octagon                                    | $D_{8h}$ | 26.874       | 27.224       | 26.894       | 28.065       | 31.582       | 30.286       |
| Heptagonal pyramid                         | $C_{7v}$ | 23.012       | 22.666       | 23.46        | 22.326       | 22.649       | 21.111       |
| Hexagonal bipyramid                        | $D_{6h}$ | 15.748       | 15.74        | 14.622       | 15.522       | 16.636       | 16.107       |
| Cube                                       | $O_h$    | 12.15        | 12.343       | 12.219       | 12.7         | 9.839        | 10.005       |
| Square antiprism                           | $D_{4d}$ | <b>1.481</b> | 1.829        | <b>1.821</b> | 2.421        | 2.241        | <b>1.392</b> |
| Triangular dodecahedron                    | $D_{2d}$ | 1.887        | <b>1.616</b> | 2.054        | <b>1.772</b> | <b>0.991</b> | 1.793        |
| Johnson gyrobifastigium J26                | $D_{2d}$ | 13.774       | 13.2         | 12.15        | 12.562       | 12.747       | 14.133       |
| Johnson elongated triangular bipyramid J14 | $D_{3h}$ | 26.586       | 26.328       | 25.367       | 25.994       | 28.775       | 27.68        |
| Biaugmented trigonal prism J50             | $C_{2v}$ | 2.445        | 2.59         | 3.015        | 2.994        | 2.855        | 2.539        |
| Biaugmented trigonal prism                 | $C_{2v}$ | 1.601        | 1.758        | 2.178        | 2.137        | 2.555        | 2.247        |
| Snub diphenoid J84                         | $D_{2d}$ | 3.949        | 3.47         | 3.851        | 3.585        | 2.841        | 3.7          |
| Configurations                             | Symmetry | CShM values  |              |              |              |              |              |
|                                            |          | Dy7          | Dy8          | Dy9          | Dy10         | Dy11         | Dy12         |
| Octagon                                    | $D_{8h}$ | 26.891       | 27.333       | 28.836       | 27.938       | 30.979       | 30.288       |
| Heptagonal pyramid                         | $C_{7v}$ | 23.215       | 22.164       | 20.589       | 23.42        | 22.1         | 20.539       |
| Hexagonal bipyramid                        | $D_{6h}$ | 15.082       | 14.844       | 16.151       | 15.233       | 16.087       | 15.783       |
| Cube                                       | $O_h$    | 12.407       | 13.025       | 13.772       | 12.493       | 9.525        | 9.968        |
| Square antiprism                           | $D_{4d}$ | <b>1.701</b> | 2.586        | 3.735        | 1.953        | 2.044        | <b>1.422</b> |
| Triangular dodecahedron                    | $D_{2d}$ | 1.987        | 2.273        | 2.391        | <b>1.539</b> | <b>0.992</b> | 2.201        |
| Johnson gyrobifastigium J26                | $D_{2d}$ | 12.848       | 11.804       | 12.526       | 12.745       | 13.313       | 14.681       |
| Johnson elongated triangular bipyramid J14 | $D_{3h}$ | 26.302       | 25.962       | 26.203       | 26.961       | 28.843       | 27.458       |
| Biaugmented trigonal prism J50             | $C_{2v}$ | 2.746        | 2.915        | 3.164        | 2.85         | 2.618        | 2.713        |
| Biaugmented trigonal prism                 | $C_{2v}$ | 1.839        | <b>1.936</b> | <b>2.237</b> | 2.091        | 2.49         | 2.462        |
| Snub diphenoid J84                         | $D_{2d}$ | 3.957        | 3.953        | 4.02         | 3.403        | 2.875        | 4.165        |

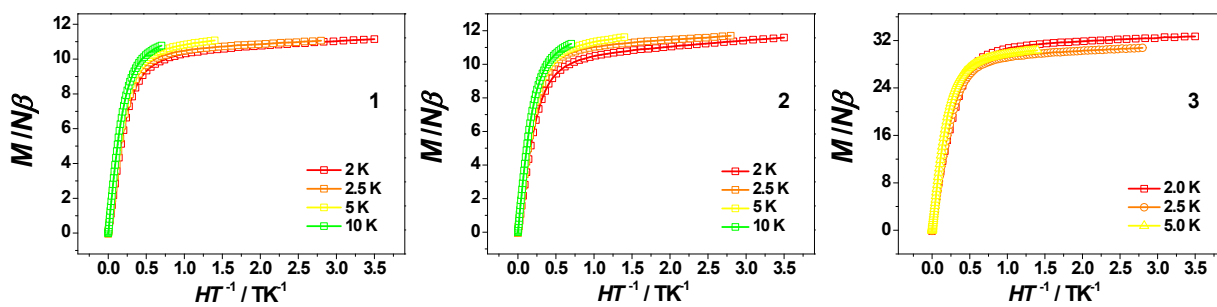

Figure S6. The plots of  $M-HT^{-1}$  of 1-3.

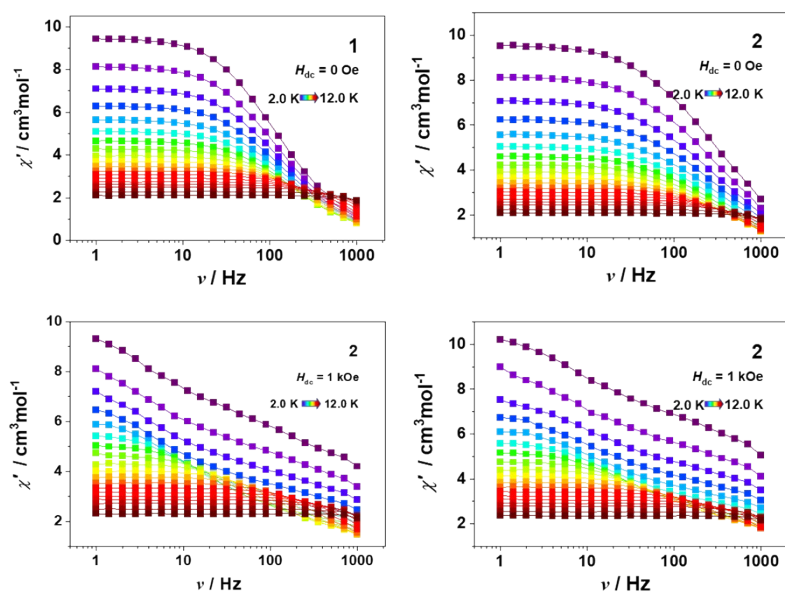

Figure S7. Frequency-dependent  $\chi'$  ac susceptibilities of 1-2 under zero and 1.0 kOe fields.

Table S4. The best fitting parameters of 1 from of ac data under zero applied dc field.

| T (K) | $\chi_s$     | $\chi_T$     | $\tau$       | $a$          |
|-------|--------------|--------------|--------------|--------------|
| 2     | 0.494447E+00 | 0.959224E+01 | 0.133495E-02 | 0.214583E+00 |
| 2.5   | 0.428643E+00 | 0.824745E+01 | 0.126730E-02 | 0.218789E+00 |
| 3     | 0.398085E+00 | 0.719547E+01 | 0.118278E-02 | 0.220279E+00 |
| 3.5   | 0.373139E+00 | 0.637404E+01 | 0.110410E-02 | 0.221546E+00 |
| 4     | 0.346463E+00 | 0.571764E+01 | 0.102639E-02 | 0.221326E+00 |
| 4.5   | 0.342031E+00 | 0.516694E+01 | 0.966060E-03 | 0.215002E+00 |
| 5     | 0.324618E+00 | 0.470549E+01 | 0.880135E-03 | 0.205986E+00 |
| 5.5   | 0.316557E+00 | 0.431840E+01 | 0.783240E-03 | 0.190930E+00 |

|     |              |              |              |              |
|-----|--------------|--------------|--------------|--------------|
| 6   | 0.302965E+00 | 0.399108E+01 | 0.671178E-03 | 0.174686E+00 |
| 6.5 | 0.286409E+00 | 0.371291E+01 | 0.556301E-03 | 0.161823E+00 |
| 7   | 0.281181E+00 | 0.347131E+01 | 0.450536E-03 | 0.152044E+00 |
| 7.5 | 0.302509E+00 | 0.326233E+01 | 0.359714E-03 | 0.141671E+00 |
| 8   | 0.343508E+00 | 0.308088E+01 | 0.287018E-03 | 0.135553E+00 |
| 8.5 | 0.417056E+00 | 0.291646E+01 | 0.230694E-03 | 0.130733E+00 |
| 9   | 0.540733E+00 | 0.275478E+01 | 0.189119E-03 | 0.116189E+00 |
| 9.5 | 0.705683E+00 | 0.261941E+01 | 0.159808E-03 | 0.102746E+00 |
| 10  | 0.900886E+00 | 0.250158E+01 | 0.140594E-03 | 0.902648E-01 |
| 11  | 0.134920E+01 | 0.228476E+01 | 0.133976E-03 | 0.283391E-01 |
| 12  | 0.156998E+01 | 0.210311E+01 | 0.127788E-03 | 0.168191E-18 |
| 13  | 0.167412E+01 | 0.195287E+01 | 0.134354E-03 | 0.333965E-18 |
| 14  | 0.168199E+01 | 0.182010E+01 | 0.155104E-03 | 0.481121E-18 |

**Table S5.** The best fitting parameters of **2** from of ac data under zero applied dc field.

| T/K | $\chi_s$     | $\chi_T$     | $\tau$       | $a$          |
|-----|--------------|--------------|--------------|--------------|
| 2   | 8.626210E-01 | 9.666910E+00 | 5.934760E-04 | 2.959790E-01 |
| 2.5 | 7.486330E-01 | 8.245470E+00 | 5.919860E-04 | 2.977950E-01 |
| 3   | 7.037080E-01 | 7.173070E+00 | 5.955190E-04 | 2.998580E-01 |
| 3.5 | 6.552810E-01 | 6.338260E+00 | 5.848020E-04 | 3.007360E-01 |
| 4   | 6.188970E-01 | 5.660470E+00 | 5.780630E-04 | 3.007140E-01 |
| 4.5 | 6.166480E-01 | 5.116790E+00 | 5.712070E-04 | 2.920900E-01 |
| 5   | 6.050310E-01 | 4.667890E+00 | 5.560920E-04 | 2.823410E-01 |
| 5.5 | 6.093090E-01 | 4.282510E+00 | 5.326560E-04 | 2.646150E-01 |
| 6   | 5.872420E-01 | 3.971390E+00 | 4.891410E-04 | 2.505610E-01 |
| 6.5 | 6.021730E-01 | 3.685290E+00 | 4.503960E-04 | 2.262360E-01 |
| 7   | 5.878480E-01 | 3.448470E+00 | 3.855740E-04 | 2.073750E-01 |
| 7.5 | 5.928920E-01 | 3.223790E+00 | 3.315320E-04 | 1.928000E-01 |
| 8   | 6.163490E-01 | 3.041230E+00 | 2.750110E-04 | 1.820190E-01 |
| 8.5 | 6.834030E-01 | 2.882720E+00 | 2.261240E-04 | 1.746770E-01 |
| 9   | 8.241300E-01 | 2.719440E+00 | 1.899940E-04 | 1.620320E-01 |
| 9.5 | 1.045050E+00 | 2.586770E+00 | 1.731920E-04 | 1.468420E-01 |
| 10  | 1.301570E+00 | 2.470070E+00 | 1.754110E-04 | 1.084530E-01 |
| 11  | 1.577570E+00 | 2.250890E+00 | 1.751670E-04 | 3.605880E-02 |
| 12  | 1.674610E+00 | 2.082930E+00 | 1.609400E-04 | 4.263250E-14 |
| 13  | 1.698470E+00 | 1.930420E+00 | 1.619120E-04 | 7.854740E-14 |
| 14  | 1.673390E+00 | 1.801200E+00 | 1.802710E-04 | 8.473630E-14 |
| 15  | 1.619810E+00 | 1.696700E+00 | 2.023640E-04 | 1.580340E-13 |



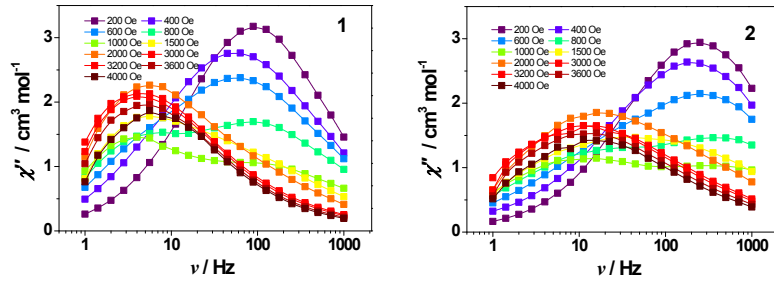

**Figure S8.** Frequency-dependent  $\chi''$  for **1-2** at 2 K under different dc fields.

**Table S6.** The best fitting parameters of **1** from of ac data under 1 kOe applied dc field.

| T/K | $\chi_s$     | $\Delta\chi_1$ | $\tau_1$     | $\alpha_1$   | $\Delta\chi_2$ | $\tau_2$     | $\alpha_2$   |
|-----|--------------|----------------|--------------|--------------|----------------|--------------|--------------|
| 2   | 3.751180E+00 | 2.717980E+00   | 6.880650E-04 | 3.122580E-01 | 3.845570E+00   | 4.680360E-02 | 3.078710E-01 |
| 2.5 | 2.859930E+00 | 2.383470E+00   | 5.085910E-04 | 3.300190E-01 | 3.736720E+00   | 4.731150E-02 | 2.931920E-01 |
| 3   | 2.336490E+00 | 2.023190E+00   | 4.228570E-04 | 3.295630E-01 | 3.545660E+00   | 4.068540E-02 | 2.784630E-01 |
| 3.5 | 1.901890E+00 | 2.052100E+00   | 4.358510E-04 | 3.878840E-01 | 2.951470E+00   | 3.271000E-02 | 2.137090E-01 |
| 4   | 1.726630E+00 | 1.637940E+00   | 3.917000E-04 | 3.400730E-01 | 2.833560E+00   | 2.206600E-02 | 1.970510E-01 |
| 4.5 | 1.626540E+00 | 1.228950E+00   | 3.471390E-04 | 2.564080E-01 | 2.725780E+00   | 1.286830E-02 | 1.769430E-01 |
| 5   | 1.448780E+00 | 1.236700E+00   | 3.826150E-04 | 2.910020E-01 | 2.405070E+00   | 7.967230E-03 | 1.317160E-01 |
| 5.5 | 1.410180E+00 | 7.893790E-01   | 2.986160E-04 | 1.455690E-01 | 2.482000E+00   | 4.236820E-03 | 1.386050E-01 |
| 6   | 1.310230E+00 | 8.608070E-01   | 3.430240E-04 | 1.506920E-01 | 2.140130E+00   | 2.628970E-03 | 1.025540E-01 |
| 6.5 | 1.277690E+00 | 6.031130E-01   | 2.769650E-04 | 2.067100E-05 | 2.142290E+00   | 1.553740E-03 | 1.053870E-01 |
| 7   | 1.216490E+00 | 7.422730E-01   | 2.623090E-04 | 1.187580E-05 | 1.820020E+00   | 1.074220E-03 | 9.046890E-02 |
| 7.5 | 1.195760E+00 | 9.501780E-01   | 2.462770E-04 | 2.126910E-05 | 1.394880E+00   | 8.054730E-04 | 8.120130E-02 |
| 8   | 1.226130E+00 | 1.166090E+00   | 2.215850E-04 | 3.840760E-05 | 9.475620E-01   | 6.454420E-04 | 7.577200E-02 |
| 8.5 | 1.298360E+00 | 1.347590E+00   | 1.954470E-04 | 4.969400E-05 | 5.071890E-01   | 6.050220E-04 | 6.029330E-02 |
| 9   | 1.427700E+00 | 1.386930E+00   | 1.759370E-04 | 3.321930E-04 | 1.815830E-01   | 7.301520E-04 | 3.738450E-06 |
| 9.5 | 1.580340E+00 | 1.208410E+00   | 1.552640E-04 | 3.025510E-04 | 7.205610E-02   | 8.708840E-04 | 1.047830E-05 |
| 10  | 1.738400E+00 | 9.605020E-01   | 1.441950E-04 | 4.930990E-04 | 1.502220E-02   | 9.687740E-04 | 2.156150E-05 |
| 11  | 1.963750E+00 | 5.224490E-01   | 1.314670E-04 | 1.171800E-03 | 3.731100E-08   | 1.859330E-03 | 2.984380E-05 |
| 12  | 2.049040E+00 | 2.519550E-01   | 1.395290E-04 | 1.210410E-09 | 1.267570E-07   | 5.006080E-03 | 1.123060E-04 |
| 13  | 2.007290E+00 | 1.182610E-01   | 1.769800E-04 | 1.565030E-09 | 1.343610E-07   | 5.585670E-03 | 1.173890E-04 |
| 14  | 1.915450E+00 | 6.790250E-02   | 2.188370E-04 | 1.851890E-09 | 1.568800E-07   | 6.897780E-03 | 1.752810E-04 |
| 15  | 1.809130E+00 | 4.856800E-02   | 2.479700E-04 | 3.112080E-09 | 1.367360E-07   | 9.229780E-03 | 5.461550E-05 |
| 16  | 1.716540E+00 | 3.865850E-02   | 2.785020E-04 | 3.069600E-09 | 1.618510E-07   | 1.090890E-02 | 5.936530E-05 |
| 17  | 1.621970E+00 | 3.322470E-02   | 2.942330E-04 | 4.479200E-09 | 1.749170E-07   | 1.197530E-02 | 6.615960E-05 |

**Table S7.** The best fitting parameters of **2** from of ac data under 1 kOe applied dc field.

| T/K | $\chi_s$     | $\Delta\chi_1$ | $\tau_1$     | $\alpha_1$   | $\Delta\chi_2$ | $\tau_2$     | $\alpha_2$   |
|-----|--------------|----------------|--------------|--------------|----------------|--------------|--------------|
| 2   | 3.897500E+00 | 3.451510E+00   | 2.915440E-04 | 3.681180E-01 | 3.208560E+00   | 2.150940E-02 | 2.475630E-01 |
| 2.5 | 3.382980E+00 | 2.249520E+00   | 2.750440E-04 | 2.721500E-01 | 3.443250E+00   | 1.988040E-02 | 3.102410E-01 |
| 3   | 3.052850E+00 | 1.119780E+00   | 2.321090E-04 | 6.783390E-02 | 3.899310E+00   | 1.442660E-02 | 3.935850E-01 |
| 3.5 | 2.513620E+00 | 1.587930E+00   | 2.662070E-04 | 2.735980E-01 | 2.960970E+00   | 1.593920E-02 | 2.826660E-01 |

|     |              |              |              |              |              |              |              |
|-----|--------------|--------------|--------------|--------------|--------------|--------------|--------------|
| 4   | 2.276370E+00 | 1.345430E+00 | 2.753640E-04 | 2.576940E-01 | 2.711460E+00 | 1.276280E-02 | 2.500320E-01 |
| 4.5 | 2.124630E+00 | 1.036710E+00 | 2.668790E-04 | 1.955990E-01 | 2.576100E+00 | 9.127730E-03 | 2.300070E-01 |
| 5   | 1.937360E+00 | 1.012610E+00 | 2.895890E-04 | 2.185850E-01 | 2.268440E+00 | 6.648210E-03 | 1.755740E-01 |
| 5.5 | 1.851200E+00 | 7.634230E-01 | 2.787760E-04 | 1.321030E-01 | 2.184200E+00 | 4.255160E-03 | 1.618440E-01 |
| 6   | 1.764410E+00 | 5.706220E-01 | 2.559660E-04 | 3.287800E-02 | 2.096370E+00 | 2.661990E-03 | 1.442520E-01 |
| 6.5 | 1.656970E+00 | 5.747680E-01 | 2.619200E-04 | 5.321450E-02 | 1.897220E+00 | 1.763200E-03 | 1.295800E-01 |
| 7   | 1.597100E+00 | 5.630350E-01 | 2.641340E-04 | 1.984120E-12 | 1.698940E+00 | 1.213920E-03 | 1.152420E-01 |
| 7.5 | 1.545600E+00 | 7.041370E-01 | 2.670910E-04 | 2.818940E-12 | 1.387970E+00 | 8.831090E-04 | 1.159130E-01 |
| 8   | 1.524670E+00 | 1.076200E+00 | 2.489950E-04 | 6.319800E-12 | 8.234050E-01 | 8.392220E-04 | 9.614380E-02 |
| 8.5 | 1.545800E+00 | 1.306790E+00 | 2.117250E-04 | 1.235980E-11 | 3.768040E-01 | 9.930030E-04 | 3.445780E-02 |
| 9   | 1.636470E+00 | 1.145270E+00 | 1.688510E-04 | 1.023700E-15 | 2.867040E-01 | 8.199250E-04 | 6.722890E-02 |
| 9.5 | 1.826080E+00 | 9.450240E-01 | 1.590890E-04 | 1.278580E-15 | 1.455690E-01 | 8.462710E-04 | 9.833970E-04 |
| 10  | 2.003690E+00 | 7.357440E-01 | 1.709990E-04 | 1.638240E-15 | 4.571310E-02 | 9.530550E-04 | 1.714530E-03 |
| 11  | 2.124700E+00 | 4.172490E-01 | 1.717770E-04 | 2.195030E-15 | 1.535940E-14 | 1.815090E-03 | 2.801960E-03 |
| 12  | 2.133460E+00 | 2.209990E-01 | 1.644600E-04 | 3.174780E-15 | 2.248870E-15 | 2.858570E-03 | 3.329090E-03 |
| 13  | 2.064170E+00 | 1.099220E-01 | 1.878340E-04 | 3.755910E-15 | 2.593420E-15 | 3.411890E-03 | 3.865950E-03 |
| 14  | 1.966220E+00 | 6.038960E-02 | 2.276510E-04 | 4.248390E-15 | 1.430710E-15 | 4.019020E-03 | 3.209670E-03 |
| 15  | 1.858810E+00 | 4.268140E-02 | 2.630610E-04 | 5.327200E-15 | 1.768600E-15 | 4.290830E-03 | 3.729970E-03 |

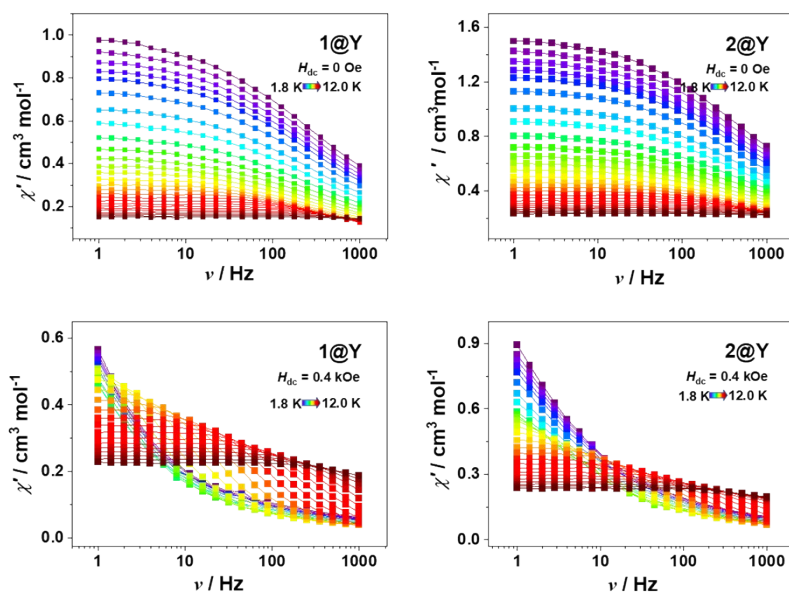

**Figure S9.** Frequency-dependent  $\chi''$  ac susceptibilities of **1@Y** and **2@Y** under zero and 1.0 kOe fields.

**Table S8.** The best fitting parameters of **1@Y** from of ac data under zero applied dc field.

| T/K  | $\chi_s$     | $\chi_T$     | $\tau$       | $a$          |
|------|--------------|--------------|--------------|--------------|
| 1.8  | 6.443900E-02 | 1.011550E+00 | 4.954670E-04 | 4.905730E-01 |
| 1.9  | 6.729010E-02 | 9.537950E-01 | 4.965020E-04 | 4.828670E-01 |
| 2    | 6.822390E-02 | 9.040670E-01 | 5.027040E-04 | 4.803680E-01 |
| 2.1  | 6.315050E-02 | 8.618260E-01 | 4.980060E-04 | 4.800290E-01 |
| 2.2  | 6.111400E-02 | 8.244350E-01 | 5.005770E-04 | 4.811900E-01 |
| 2.4  | 5.367420E-02 | 7.581770E-01 | 4.927160E-04 | 4.831160E-01 |
| 2.7  | 5.168760E-02 | 6.753500E-01 | 4.957240E-04 | 4.807540E-01 |
| 3    | 4.431250E-02 | 6.089300E-01 | 4.791410E-04 | 4.843120E-01 |
| 3.4  | 4.071720E-02 | 5.393450E-01 | 4.650190E-04 | 4.860370E-01 |
| 3.8  | 4.659740E-02 | 4.831970E-01 | 4.745030E-04 | 4.764790E-01 |
| 4.2  | 4.824300E-02 | 4.376640E-01 | 4.660330E-04 | 4.681020E-01 |
| 4.6  | 5.416370E-02 | 4.003440E-01 | 4.781120E-04 | 4.518920E-01 |
| 5    | 6.151850E-02 | 3.679150E-01 | 4.922740E-04 | 4.280820E-01 |
| 5.5  | 6.653070E-02 | 3.335340E-01 | 4.846710E-04 | 3.927990E-01 |
| 6    | 7.151780E-02 | 3.057200E-01 | 4.760640E-04 | 3.491770E-01 |
| 6.5  | 7.212700E-02 | 2.834890E-01 | 4.420770E-04 | 3.151320E-01 |
| 7    | 7.260870E-02 | 2.616430E-01 | 3.917460E-04 | 2.702310E-01 |
| 7.5  | 6.691720E-02 | 2.441730E-01 | 3.197680E-04 | 2.451410E-01 |
| 8    | 6.721020E-02 | 2.279540E-01 | 2.731920E-04 | 2.060730E-01 |
| 8.5  | 6.449740E-02 | 2.135960E-01 | 2.220340E-04 | 1.760580E-01 |
| 9    | 5.734960E-02 | 2.028640E-01 | 1.705570E-04 | 1.774340E-01 |
| 9.5  | 5.644700E-02 | 1.911410E-01 | 1.377090E-04 | 1.538750E-01 |
| 10   | 4.360510E-02 | 1.821560E-01 | 9.498290E-05 | 1.686680E-01 |
| 10.5 | 4.936760E-02 | 1.728280E-01 | 8.127170E-05 | 1.336740E-01 |
| 11   | 4.276890E-02 | 1.651700E-01 | 5.861800E-05 | 1.344970E-01 |
| 11.5 | 1.477770E-02 | 1.578560E-01 | 3.316750E-05 | 1.374580E-01 |
| 12   | 4.195590E-14 | 1.516640E-01 | 2.195280E-05 | 1.462270E-01 |

**Table S9.** The best fitting parameters of **2@Y** from of ac data under zero applied dc field.

| T/K | $\chi_s$     | $\chi_T$     | $\tau$       | $a$          |
|-----|--------------|--------------|--------------|--------------|
| 1.8 | 1.755770E-01 | 1.534990E+00 | 3.015890E-04 | 4.653050E-01 |
| 1.9 | 1.574660E-01 | 1.455630E+00 | 2.939570E-04 | 4.689380E-01 |
| 2   | 1.602240E-01 | 1.382150E+00 | 2.997300E-04 | 4.651530E-01 |
| 2.1 | 1.534980E-01 | 1.319050E+00 | 3.012790E-04 | 4.670060E-01 |
| 2.2 | 1.413110E-01 | 1.259980E+00 | 2.914810E-04 | 4.670100E-01 |
| 2.4 | 1.490010E-01 | 1.156560E+00 | 3.025910E-04 | 4.616920E-01 |
| 2.7 | 1.246490E-01 | 1.032100E+00 | 2.854410E-04 | 4.705120E-01 |
| 3   | 1.334120E-01 | 9.283940E-01 | 2.914270E-04 | 4.609080E-01 |
| 3.4 | 1.128940E-01 | 8.225370E-01 | 2.635380E-04 | 4.700440E-01 |

|      |              |              |              |              |
|------|--------------|--------------|--------------|--------------|
| 3.8  | 1.257970E-01 | 7.363980E-01 | 2.742090E-04 | 4.592170E-01 |
| 4.2  | 1.228420E-01 | 6.670950E-01 | 2.638900E-04 | 4.526340E-01 |
| 4.6  | 1.219810E-01 | 6.125460E-01 | 2.610430E-04 | 4.478430E-01 |
| 5    | 1.303380E-01 | 5.632500E-01 | 2.727660E-04 | 4.260210E-01 |
| 5.5  | 1.406550E-01 | 5.112890E-01 | 2.828080E-04 | 3.930080E-01 |
| 6    | 1.422560E-01 | 4.665410E-01 | 2.702410E-04 | 3.547170E-01 |
| 6.5  | 1.435570E-01 | 4.307060E-01 | 2.584510E-04 | 3.140830E-01 |
| 7    | 1.354360E-01 | 4.003360E-01 | 2.186860E-04 | 2.918760E-01 |
| 7.5  | 1.319670E-01 | 3.726820E-01 | 1.856590E-04 | 2.643080E-01 |
| 8    | 1.245540E-01 | 3.498080E-01 | 1.468720E-04 | 2.545730E-01 |
| 8.5  | 1.089660E-01 | 3.292150E-01 | 1.058470E-04 | 2.481200E-01 |
| 9    | 8.657610E-02 | 3.114090E-01 | 6.799820E-05 | 2.632050E-01 |
| 9.5  | 9.734550E-02 | 2.948380E-01 | 5.654820E-05 | 2.518200E-01 |
| 10   | 5.756490E-02 | 2.800960E-01 | 2.936980E-05 | 2.701910E-01 |
| 10.5 | 8.887120E-02 | 2.676680E-01 | 2.900960E-05 | 2.673950E-01 |
| 11   | 5.687100E-02 | 2.550380E-01 | 1.648570E-05 | 2.726550E-01 |
| 11.5 | 3.638660E-07 | 2.439080E-01 | 9.152030E-06 | 2.764000E-01 |
| 12   | 5.698000E-07 | 2.343030E-01 | 7.051010E-06 | 2.616620E-01 |

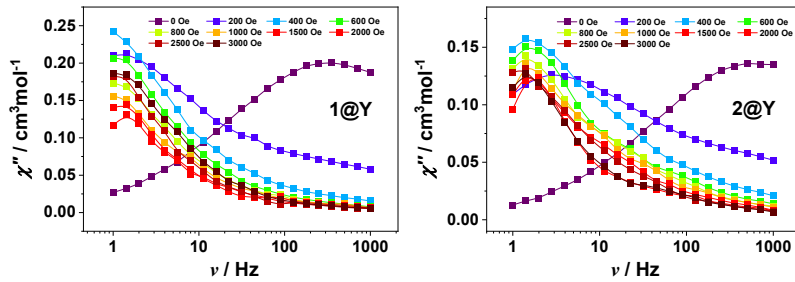

**Figure S10.** Frequency-dependent  $\chi''$  for 1-2 at 2 K under different dc fields.

**Table S10.** The best fitting parameters of 1@Y from of ac data under 0.4 kOe applied dc field.

| T/K | $\chi_s$     | $\chi_T$     | $\tau$       | $a$          |
|-----|--------------|--------------|--------------|--------------|
| 1.8 | 5.836460E-02 | 2.016190E+00 | 7.795790E-01 | 4.437910E-01 |
| 2   | 5.269110E-02 | 1.917700E+00 | 8.119650E-01 | 4.598550E-01 |
| 2.2 | 4.899730E-02 | 1.684600E+00 | 6.632660E-01 | 4.609830E-01 |
| 2.4 | 4.748040E-02 | 1.443300E+00 | 4.880770E-01 | 4.545220E-01 |
| 2.7 | 4.223810E-02 | 1.301940E+00 | 4.276620E-01 | 4.586050E-01 |
| 3   | 4.108580E-02 | 1.185660E+00 | 3.733050E-01 | 4.547990E-01 |
| 3.4 | 4.082110E-02 | 9.975490E-01 | 2.373250E-01 | 4.292180E-01 |
| 3.8 | 3.979640E-02 | 8.581850E-01 | 1.414460E-01 | 3.927920E-01 |
| 4.2 | 4.108140E-02 | 7.316470E-01 | 7.695370E-02 | 3.438660E-01 |
| 4.6 | 4.123260E-02 | 6.283580E-01 | 4.151550E-02 | 2.834770E-01 |

|      |              |              |              |              |
|------|--------------|--------------|--------------|--------------|
| 5    | 3.992660E-02 | 5.655570E-01 | 2.470740E-02 | 2.478110E-01 |
| 5.5  | 3.661900E-02 | 5.045520E-01 | 1.331330E-02 | 2.192750E-01 |
| 6    | 3.274810E-02 | 4.606250E-01 | 7.499270E-03 | 1.962370E-01 |
| 6.5  | 3.023760E-02 | 4.237670E-01 | 4.447480E-03 | 1.907580E-01 |
| 7    | 2.827310E-02 | 3.914320E-01 | 2.720660E-03 | 1.786890E-01 |
| 7.5  | 2.676490E-02 | 3.648200E-01 | 1.725480E-03 | 1.670570E-01 |
| 8    | 2.574780E-02 | 3.416690E-01 | 1.122250E-03 | 1.666510E-01 |
| 8.5  | 2.676360E-02 | 3.215620E-01 | 7.545900E-04 | 1.622590E-01 |
| 9    | 2.908170E-02 | 3.027540E-01 | 5.193010E-04 | 1.621280E-01 |
| 9.5  | 2.766910E-02 | 2.870200E-01 | 3.558980E-04 | 1.657680E-01 |
| 10   | 3.668890E-02 | 2.729460E-01 | 2.591220E-04 | 1.586110E-01 |
| 10.5 | 3.922800E-02 | 2.606320E-01 | 1.820380E-04 | 1.700540E-01 |
| 11   | 4.878160E-02 | 2.484230E-01 | 1.330470E-04 | 1.709200E-01 |
| 11.5 | 6.353950E-02 | 2.375170E-01 | 1.062500E-04 | 1.532590E-01 |
| 12   | 6.174810E-02 | 2.270390E-01 | 7.036310E-05 | 1.726310E-01 |

**Table S11.** The best fitting parameters of **2@Y** from of ac data under 0.4 kOe applied dc field.

| T/K | $\chi_s$     | $\chi_T$     | $\tau$       | $a$          |
|-----|--------------|--------------|--------------|--------------|
| 1.8 | 7.933020E-02 | 1.846370E+00 | 2.192960E-01 | 4.995500E-01 |
| 1.9 | 6.562900E-02 | 1.918090E+00 | 2.941950E-01 | 5.365090E-01 |
| 2   | 6.424060E-02 | 1.748710E+00 | 2.348140E-01 | 5.291690E-01 |
| 2.1 | 6.342640E-02 | 1.623540E+00 | 2.004530E-01 | 5.206980E-01 |
| 2.2 | 6.529080E-02 | 1.534390E+00 | 1.876910E-01 | 5.204020E-01 |
| 2.4 | 6.102760E-02 | 1.400550E+00 | 1.687670E-01 | 5.258170E-01 |
| 2.7 | 5.984560E-02 | 1.294140E+00 | 1.734280E-01 | 5.290410E-01 |
| 3   | 6.239580E-02 | 1.137280E+00 | 1.360000E-01 | 5.117120E-01 |
| 3.4 | 5.765610E-02 | 9.953220E-01 | 1.006890E-01 | 5.087620E-01 |
| 3.8 | 6.198340E-02 | 8.415070E-01 | 6.250430E-02 | 4.597120E-01 |
| 4.2 | 6.272120E-02 | 7.313330E-01 | 3.790100E-02 | 4.137450E-01 |
| 4.6 | 6.461670E-02 | 6.571600E-01 | 2.574450E-02 | 3.796320E-01 |
| 5   | 6.198870E-02 | 5.834980E-01 | 1.521780E-02 | 3.399220E-01 |
| 5.5 | 5.949270E-02 | 5.266520E-01 | 8.953980E-03 | 3.096750E-01 |
| 6   | 5.430810E-02 | 4.768870E-01 | 5.293190E-03 | 2.880950E-01 |
| 6.5 | 5.130200E-02 | 4.377200E-01 | 3.201900E-03 | 2.672590E-01 |
| 7   | 5.023220E-02 | 4.071050E-01 | 2.022520E-03 | 2.605740E-01 |
| 7.5 | 4.549980E-02 | 3.753470E-01 | 1.245190E-03 | 2.651560E-01 |
| 8   | 4.626280E-02 | 3.547090E-01 | 8.335240E-04 | 2.743660E-01 |
| 8.5 | 5.331770E-02 | 3.341950E-01 | 5.563630E-04 | 2.711240E-01 |
| 9   | 5.507770E-02 | 3.152080E-01 | 3.590840E-04 | 3.031950E-01 |

|      |              |              |              |              |
|------|--------------|--------------|--------------|--------------|
| 9.5  | 7.659340E-02 | 2.983460E-01 | 2.837710E-04 | 2.952770E-01 |
| 10   | 1.034230E-01 | 2.826470E-01 | 2.535340E-04 | 2.729650E-01 |
| 10.5 | 1.228290E-01 | 2.682680E-01 | 2.333420E-04 | 2.375000E-01 |
| 11   | 1.237970E-01 | 2.560150E-01 | 1.803870E-04 | 2.496780E-01 |
| 11.5 | 1.438500E-01 | 2.442580E-01 | 1.805800E-04 | 1.834290E-01 |
| 12   | 1.584950E-01 | 2.368610E-01 | 1.850260E-04 | 1.373110E-01 |

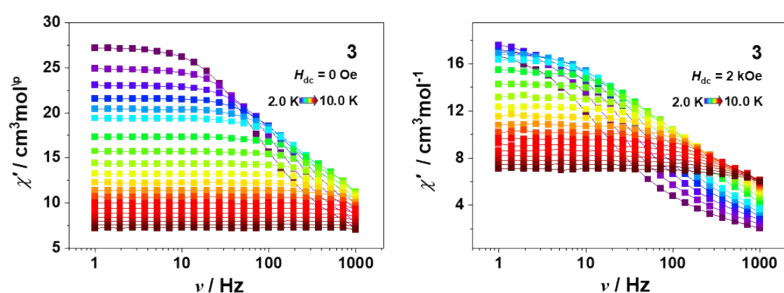

**Figure S11.** Frequency-dependent  $\chi'$  ac susceptibilities of **3** under zero and 2.0 kOe field.

**Table S12.** The best fitting parameters of **3** from of ac data under zero applied dc field.

| T/K | $\chi_s$     | $\chi_T$     | $\tau$       | $a$          |
|-----|--------------|--------------|--------------|--------------|
| 2   | 5.927760E+00 | 2.780550E+01 | 1.838700E-03 | 2.286730E-01 |
| 2.2 | 6.035680E+00 | 2.527400E+01 | 1.123980E-03 | 2.137980E-01 |
| 2.4 | 6.200360E+00 | 2.333770E+01 | 7.502040E-04 | 2.011190E-01 |
| 2.6 | 6.373940E+00 | 2.181910E+01 | 5.400960E-04 | 1.903960E-01 |
| 2.8 | 6.543520E+00 | 2.056920E+01 | 4.117000E-04 | 1.812750E-01 |
| 3   | 6.722260E+00 | 1.951100E+01 | 3.305390E-04 | 1.709220E-01 |
| 3.5 | 7.099990E+00 | 1.738950E+01 | 2.230470E-04 | 1.456040E-01 |
| 4   | 7.311820E+00 | 1.574860E+01 | 1.739250E-04 | 1.220570E-01 |
| 4.5 | 7.390820E+00 | 1.439250E+01 | 1.475340E-04 | 9.719980E-02 |
| 5   | 7.391680E+00 | 1.324270E+01 | 1.296910E-04 | 7.388460E-02 |
| 5.5 | 7.365270E+00 | 1.225860E+01 | 1.161260E-04 | 5.243720E-02 |
| 6   | 7.453220E+00 | 1.140230E+01 | 1.079260E-04 | 2.509400E-02 |
| 6.5 | 7.520100E+00 | 1.065390E+01 | 1.013290E-04 | 6.404190E-15 |
| 7   | 7.424060E+00 | 9.993650E+00 | 8.906530E-05 | 2.866490E-16 |
| 7.5 | 7.396010E+00 | 9.403120E+00 | 8.183100E-05 | 4.404310E-16 |
| 8   | 7.386890E+00 | 8.879560E+00 | 7.903160E-05 | 6.625540E-16 |
| 8.5 | 7.356360E+00 | 8.407240E+00 | 7.976720E-05 | 9.851760E-16 |
| 9   | 7.271250E+00 | 7.982630E+00 | 8.389270E-05 | 1.563450E-15 |
| 9.5 | 7.161680E+00 | 7.594930E+00 | 9.594450E-05 | 1.905500E-15 |
| 10  | 6.987120E+00 | 7.243450E+00 | 1.119280E-04 | 3.652630E-15 |

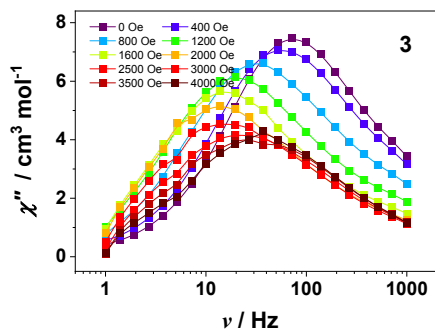

**Figure S12.** Frequency-dependent  $\chi''$  for **3** at 2 K under different dc fields.

**Table S13.** The best fitting parameters of **3** from of ac data under 2.0 kOe applied dc field.

| T/K | $\chi_s$     | $\chi_T$     | $\tau$       | $a$          |
|-----|--------------|--------------|--------------|--------------|
| 2   | 1.662970E+00 | 1.800630E+01 | 8.715460E-03 | 3.236350E-01 |
| 2.2 | 1.837210E+00 | 1.838600E+01 | 6.168570E-03 | 3.246560E-01 |
| 2.4 | 2.037190E+00 | 1.812290E+01 | 4.286980E-03 | 3.141620E-01 |
| 2.6 | 2.255640E+00 | 1.775480E+01 | 3.159330E-03 | 3.017300E-01 |
| 2.8 | 2.372850E+00 | 1.746570E+01 | 2.460080E-03 | 2.998690E-01 |
| 3   | 2.466300E+00 | 1.688370E+01 | 1.916210E-03 | 2.948800E-01 |
| 3.5 | 2.621800E+00 | 1.574230E+01 | 1.198520E-03 | 2.884860E-01 |
| 4   | 2.737560E+00 | 1.453150E+01 | 8.298990E-04 | 2.765520E-01 |
| 4.5 | 2.805880E+00 | 1.341140E+01 | 6.125660E-04 | 2.639340E-01 |
| 5   | 2.823710E+00 | 1.248940E+01 | 4.764840E-04 | 2.567560E-01 |
| 5.5 | 2.807170E+00 | 1.166240E+01 | 3.740260E-04 | 2.537460E-01 |
| 6   | 2.919340E+00 | 1.090800E+01 | 3.054770E-04 | 2.420010E-01 |
| 6.5 | 2.851920E+00 | 1.027100E+01 | 2.417980E-04 | 2.503340E-01 |
| 7   | 2.932250E+00 | 9.690580E+00 | 1.989350E-04 | 2.495760E-01 |
| 7.5 | 3.139140E+00 | 9.151430E+00 | 1.700320E-04 | 2.436380E-01 |
| 8   | 3.303710E+00 | 8.681750E+00 | 1.449060E-04 | 2.473580E-01 |
| 8.5 | 3.517570E+00 | 8.244550E+00 | 1.273280E-04 | 2.474610E-01 |
| 9   | 3.667940E+00 | 7.840900E+00 | 1.092540E-04 | 2.564390E-01 |
| 9.5 | 3.988620E+00 | 7.480200E+00 | 1.044040E-04 | 2.533250E-01 |
| 10  | 4.455860E+00 | 7.111280E+00 | 1.164700E-04 | 2.144040E-01 |

## Computational details

Binuclear complexes **1** and **2** both have one type of magnetic center Dy<sup>III</sup> ion, thus we only need to calculate one Dy<sup>III</sup> fragment for each of them. Complex **3** has two types of structures indicated as **3a** and **3b** which both have six types of individual Dy<sup>III</sup> fragments. All of individual Dy<sup>III</sup> fragments (see Figure S1 for the calculated model structures of **Dy1** fragments in complexes **1–3**) on the basis of single-crystal X-ray determined geometry have been carried out by complete-active-space self-consistent field (CASSCF) with MOLCAS 8.4 program package.<sup>S1</sup> Each individual Dy<sup>III</sup> fragment in **1–3** was calculated keeping the experimentally determined structure of the corresponding compound while replacing the other Dy<sup>III</sup> ions with diamagnetic Lu<sup>III</sup>.<sup>S2</sup>

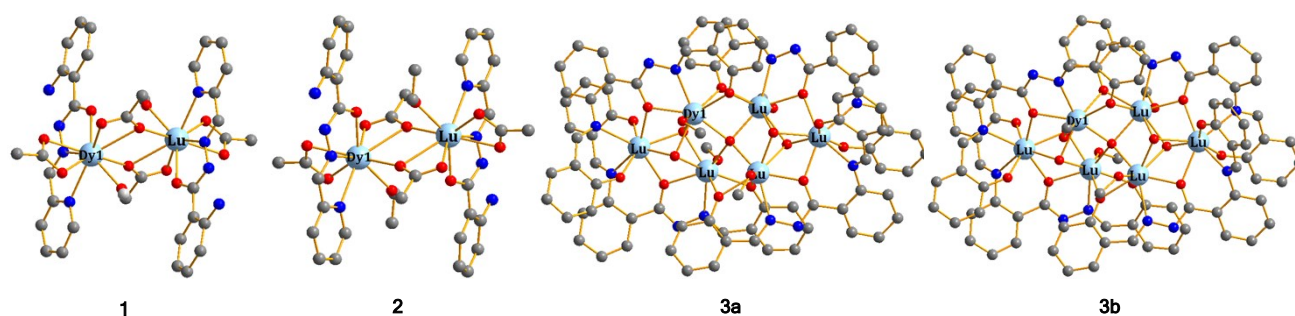

**Figure S13.** Calculated model structures of **Dy1** fragments in **1–3**; H atoms are omitted.

The basis sets for all atoms are atomic natural orbitals from the MOLCAS ANO-RCC library: ANO-RCC-VTZP for Dy<sup>III</sup>; VTZ for close O and N; VDZ for distant atoms. The calculations employed the second order Douglas-Kroll-Hess Hamiltonian, where scalar relativistic contractions were taken into account in the basis set and the spin-orbit couplings were handled separately in the restricted active space state interaction (RASSI-SO) procedure. For individual Dy<sup>III</sup> fragment, active electrons in 7 active spaces include all *f* electrons (CAS(9 in 7 for Dy<sup>III</sup>)) in the CASSCF calculation. To exclude all the doubts, we calculated all the roots in the active space. We have mixed the maximum number of spin-free state which was possible with our hardware (all from 21 sextets, 128 from 224 quadruplets, 130 from 490 doublets for Dy<sup>III</sup>). SINGLE\_ANISO<sup>S3</sup> program was used to obtain the energy levels, **g** tensors, predominant *m<sub>J</sub>* values, magnetic axes, *et al.*, based on the above CASSCF/RASSI-SO calculations.

**Table S14.** Calculated energy levels (cm<sup>-1</sup>), **g** (*g<sub>x</sub>*, *g<sub>y</sub>*, *g<sub>z</sub>*) tensors and predominant *m<sub>J</sub>* values of the lowest eight



Kramers doublets (KDs) of individual Dy<sup>III</sup> fragments for 1–3 using CASSCF/RASSI-SO with MOLCAS 8.4.

| KDs | 1_Dy1                     |                          |                      | 2_Dy1                     |                          |                      | 3a_Dy1                    |                             |                      |
|-----|---------------------------|--------------------------|----------------------|---------------------------|--------------------------|----------------------|---------------------------|-----------------------------|----------------------|
|     | <i>E/cm</i> <sup>-1</sup> | <i>g</i>                 | <i>m<sub>J</sub></i> | <i>E/cm</i> <sup>-1</sup> | <i>g</i>                 | <i>m<sub>J</sub></i> | <i>E/cm</i> <sup>-1</sup> | <i>g</i>                    | <i>m<sub>J</sub></i> |
| 1   | 0.0                       | 0.093<br>0.317<br>19.318 | ±15/2                | 0.0                       | 0.091<br>0.368<br>19.255 | ±15/2                | 0.0                       | 0.022<br>0.055<br>19.447    | ±15/2                |
| 2   | 54.5                      | 0.348<br>0.490<br>18.779 | ±7/2                 | 48.3                      | 0.090<br>0.321<br>18.919 | ±7/2                 | 33.8                      | 0.0151<br>0.0791<br>19.1415 | ±11/2                |
| 3   | 112.8                     | 1.617<br>1.859<br>15.615 | ±9/2                 | 118.4                     | 1.339<br>2.462<br>15.177 | ±9/2                 | 153.1                     | 1.736<br>2.713<br>15.420    | ±5/2                 |
| 4   | 142.1                     | 11.570<br>6.981<br>2.314 | ±11/2                | 137.9                     | 11.258<br>6.527<br>1.606 | ±13/2                | 197.6                     | 5.075<br>6.130<br>7.8153    | ±9/2                 |
| 5   | 166.8                     | 0.109<br>1.297<br>12.367 | ±5/2                 | 171.0                     | 1.402<br>2.379<br>12.286 | ±3/2                 | 257.4                     | 0.708<br>2.666<br>11.766    | ±3/2                 |
| 6   | 212.8                     | 0.876<br>1.068<br>18.023 | ±13/2                | 235.2                     | 0.328<br>1.057<br>18.063 | ±11/2                | 338.6                     | 0.784<br>1.389<br>14.980    | ±1/2                 |
| 7   | 259.2                     | 0.433<br>0.729<br>16.474 | ±3/2                 | 265.5                     | 0.553<br>1.230<br>15.774 | ±1/2                 | 427.4                     | 0.298<br>0.393<br>18.581    | ±7/2                 |
| 8   | 396.2                     | 0.050<br>0.062<br>19.213 | ±1/2                 | 401.2                     | 0.057<br>0.068<br>19.160 | ±5/2                 | 706.1                     | 0.007<br>0.011<br>19.757    | ±13/2                |
| KDs | 3a_Dy2                    |                          |                      | 3a_Dy3                    |                          |                      | 3a_Dy4                    |                             |                      |
|     | <i>E/cm</i> <sup>-1</sup> | <i>g</i>                 | <i>m<sub>J</sub></i> | <i>E/cm</i> <sup>-1</sup> | <i>g</i>                 | <i>m<sub>J</sub></i> | <i>E/cm</i> <sup>-1</sup> | <i>g</i>                    | <i>m<sub>J</sub></i> |
| 1   | 0.0                       | 0.021<br>0.039<br>19.775 | ±15/2                | 0.0                       | 0.164<br>0.602<br>18.693 | ±15/2                | 0.0                       | 0.009<br>0.015<br>19.785    | ±15/2                |
| 2   | 110.0                     | 0.242<br>0.325<br>19.231 | ±9/2                 | 46.8                      | 0.071<br>0.523<br>17.256 | ±13/2                | 138.0                     | 0.196<br>0.269<br>18.771    | ±11/2                |
| 3   | 210.4                     | 9.667<br>8.363<br>3.314  | ±11/2                | 190.7                     | 2.589<br>4.706<br>12.763 | ±9/2                 | 239.8                     | 2.402<br>4.048<br>12.136    | ±13/2                |
| 4   | 248.3                     | 0.905<br>2.960<br>10.123 | ±5/2                 | 248.9                     | 8.268<br>5.937<br>2.488  | ±7/2                 | 292.1                     | 2.068<br>5.756<br>9.485     | ±5/2                 |
| 5   | 310.1                     | 1.147<br>3.797<br>11.657 | ±3/2                 | 327.3                     | 1.396<br>3.360<br>11.655 | ±3/2                 | 354.3                     | 1.578<br>4.417<br>11.250    | ±3/2                 |

|     |                    |                          |            |                    |                          |            |                    |                          |            |
|-----|--------------------|--------------------------|------------|--------------------|--------------------------|------------|--------------------|--------------------------|------------|
| 6   | 384.0              | 1.055<br>1.607<br>15.143 | $\pm 1/2$  | 425.5              | 0.779<br>1.261<br>14.958 | $\pm 1/2$  | 418.5              | 0.811<br>1.336<br>15.654 | $\pm 1/2$  |
| 7   | 438.0              | 0.194<br>0.330<br>18.875 | $\pm 7/2$  | 525.4              | 0.183<br>0.258<br>18.470 | $\pm 5/2$  | 510.3              | 0.181<br>0.322<br>18.756 | $\pm 7/2$  |
| 8   | 640.8              | 0.018<br>0.023<br>19.791 | $\pm 13/2$ | 753.8              | 0.015<br>0.022<br>19.779 | $\pm 11/2$ | 664.5              | 0.029<br>0.055<br>19.699 | $\pm 9/2$  |
| KDs | <b>3a_Dy5</b>      |                          |            | <b>3a_Dy6</b>      |                          |            | <b>3b_Dy1</b>      |                          |            |
|     | $E/\text{cm}^{-1}$ | <b><i>g</i></b>          | $m_J$      | $E/\text{cm}^{-1}$ | <b><i>g</i></b>          | $m_J$      | $E/\text{cm}^{-1}$ | <b><i>g</i></b>          | $m_J$      |
| 1   | 0.0                | 0.000<br>0.001<br>19.675 | $\pm 15/2$ | 0.0                | 0.002<br>0.003<br>19.656 | $\pm 15/2$ | 0.0                | 0.038<br>0.087<br>19.636 | $\pm 15/2$ |
| 2   | 214.6              | 0.137<br>0.160<br>16.589 | $\pm 13/2$ | 182.7              | 0.086<br>0.100<br>16.572 | $\pm 13/2$ | 95.1               | 0.232<br>0.330<br>18.580 | $\pm 13/2$ |
| 3   | 359.3              | 1.586<br>3.122<br>11.862 | $\pm 11/2$ | 315.6              | 0.645<br>0.839<br>13.344 | $\pm 11/2$ | 215.4              | 2.767<br>5.474<br>11.511 | $\pm 9/2$  |
| 4   | 420.7              | 1.539<br>2.000<br>14.116 | $\pm 3/2$  | 390.8              | 3.572<br>4.562<br>11.827 | $\pm 7/2$  | 274.8              | 8.149<br>5.601<br>1.668  | $\pm 5/2$  |
| 5   | 467.3              | 1.365<br>2.669<br>11.586 | $\pm 9/2$  | 428.5              | 2.164<br>3.880<br>8.005  | $\pm 3/2$  | 361.8              | 1.777<br>3.600<br>11.485 | $\pm 3/2$  |
| 6   | 518.2              | 8.357<br>6.534<br>3.444  | $\pm 7/2$  | 500.5              | 0.710<br>5.231<br>9.805  | $\pm 5/2$  | 458.8              | 0.591<br>1.009<br>15.336 | $\pm 1/2$  |
| 7   | 568.0              | 1.594<br>3.164<br>13.937 | $\pm 5/2$  | 559.9              | 1.611<br>2.716<br>12.465 | $\pm 9/2$  | 556.5              | 0.152<br>0.228<br>18.721 | $\pm 7/2$  |
| 8   | 634.0              | 0.126<br>0.362<br>19.215 | $\pm 1/2$  | 600.4              | 0.597<br>2.360<br>17.339 | $\pm 1/2$  | 759.0              | 0.018<br>0.029<br>19.784 | $\pm 11/2$ |
| KDs | <b>3b_Dy2</b>      |                          |            | <b>3b_Dy3</b>      |                          |            | <b>3b_Dy4</b>      |                          |            |
|     | $E/\text{cm}^{-1}$ | <b><i>g</i></b>          | $m_J$      | $E/\text{cm}^{-1}$ | <b><i>g</i></b>          | $m_J$      | $E/\text{cm}^{-1}$ | <b><i>g</i></b>          | $m_J$      |
| 1   | 0.0                | 0.027<br>0.058<br>19.729 | $\pm 15/2$ | 0.0                | 0.014<br>0.025<br>19.783 | $\pm 15/2$ | 0.0                | 0.079<br>0.203<br>19.545 | $\pm 15/2$ |
| 2   | 110.3              | 0.265<br>0.394<br>18.686 | $\pm 9/2$  | 138.9              | 0.368<br>0.557<br>18.728 | $\pm 9/2$  | 67.5               | 0.190<br>0.380<br>18.914 | $\pm 11/2$ |
| 3   | 217.1              | 9.305<br>8.271           | $\pm 11/2$ | 234.0              | 3.603<br>6.694           | $\pm 13/2$ | 187.1              | 3.197<br>5.673           | $\pm 7/2$  |

|     |                    |                          |            |                    |                          |            |       |                          |            |
|-----|--------------------|--------------------------|------------|--------------------|--------------------------|------------|-------|--------------------------|------------|
|     |                    | 3.294                    |            |                    | 10.872                   |            |       | 12.586                   |            |
| 4   | 264.4              | 0.712<br>3.634<br>9.330  | $\pm 5/2$  | 289.4              | 1.119<br>4.571<br>8.301  | $\pm 5/2$  | 237.4 | 1.817<br>4.701<br>8.934  | $\pm 5/2$  |
| 5   | 338.0              | 1.687<br>3.707<br>11.693 | $\pm 3/2$  | 362.8              | 1.730<br>3.760<br>12.190 | $\pm 1/2$  | 313.4 | 0.700<br>2.747<br>11.796 | $\pm 3/2$  |
| 6   | 422.0              | 0.637<br>1.089<br>15.240 | $\pm 1/2$  | 443.2              | 0.540<br>1.109<br>15.205 | $\pm 3/2$  | 397.4 | 0.796<br>1.198<br>15.909 | $\pm 1/2$  |
| 7   | 501.5              | 0.164<br>0.239<br>18.670 | $\pm 7/2$  | 553.3              | 0.171<br>0.227<br>18.649 | $\pm 7/2$  | 478.2 | 0.184<br>0.275<br>18.859 | $\pm 9/2$  |
| 8   | 715.8              | 0.015<br>0.022<br>19.774 | $\pm 13/2$ | 716.9              | 0.026<br>0.044<br>19.630 | $\pm 11/2$ | 643.6 | 0.032<br>0.052<br>19.695 | $\pm 13/2$ |
| KDs |                    | <b>3b_Dy5</b>            |            |                    | <b>3b_Dy6</b>            |            |       |                          |            |
|     | $E/\text{cm}^{-1}$ | <b><i>g</i></b>          | $m_J$      | $E/\text{cm}^{-1}$ | <b><i>g</i></b>          | $m_J$      |       |                          |            |
| 1   | 0.0                | 0.000<br>0.001<br>19.635 | $\pm 15/2$ | 0.0                | 0.003<br>0.004<br>19.622 | $\pm 15/2$ |       |                          |            |
| 2   | 192.7              | 0.189<br>0.205<br>16.361 | $\pm 13/2$ | 173.9              | 0.084<br>0.101<br>16.569 | $\pm 13/2$ |       |                          |            |
| 3   | 312.0              | 2.141<br>3.657<br>11.381 | $\pm 11/2$ | 309.4              | 0.557<br>0.579<br>13.537 | $\pm 11/2$ |       |                          |            |
| 4   | 370.5              | 1.482<br>2.908<br>11.573 | $\pm 3/2$  | 407.8              | 2.945<br>4.655<br>8.998  | $\pm 9/2$  |       |                          |            |
| 5   | 413.0              | 2.607<br>4.015<br>10.160 | $\pm 9/2$  | 450.0              | 10.602<br>6.559<br>0.333 | $\pm 1/2$  |       |                          |            |
| 6   | 472.3              | 3.534<br>4.192<br>6.740  | $\pm 7/2$  | 510.6              | 1.263<br>4.942<br>9.627  | $\pm 5/2$  |       |                          |            |
| 7   | 514.1              | 9.445<br>7.756<br>2.700  | $\pm 5/2$  | 576.5              | 0.929<br>2.802<br>11.589 | $\pm 3/2$  |       |                          |            |
| 8   | 570.5              | 0.296<br>0.994<br>18.634 | $\pm 1/2$  | 616.0              | 0.682<br>2.886<br>16.286 | $\pm 7/2$  |       |                          |            |

**Table S15.** Wave functions with definite projection of the total moment  $|m_J\rangle$  for the lowest two KDs of individual Dy<sup>III</sup> fragments for 1–3 using CASSCF/RASSI-SO with MOLCAS 8.4.

|               | $E/\text{cm}^{-1}$ | wave functions                                                                                                                                                    |
|---------------|--------------------|-------------------------------------------------------------------------------------------------------------------------------------------------------------------|
| <b>1_Dy1</b>  | 0.0                | 94% $ \pm 15/2\rangle$                                                                                                                                            |
|               | 54.5               | 10% $ \pm 9/2\rangle$ +23% $ \pm 7/2\rangle$ +22% $ \pm 5/2\rangle$ +21% $ \pm 3/2\rangle$ +17% $ \pm 1/2\rangle$                                                 |
| <b>2_Dy1</b>  | 0.0                | 94% $ \pm 15/2\rangle$                                                                                                                                            |
|               | 48.3               | 13% $ \pm 9/2\rangle$ +23% $ \pm 7/2\rangle$ +20% $ \pm 5/2\rangle$ +18% $ \pm 3/2\rangle$ +15% $ \pm 1/2\rangle$                                                 |
| <b>3a_Dy1</b> | 0.0                | 96% $ \pm 15/2\rangle$                                                                                                                                            |
|               | 33.8               | 15% $ \pm 9/2\rangle$ +18% $ \pm 7/2\rangle$ +20% $ \pm 5/2\rangle$ +18% $ \pm 3/2\rangle$ +15% $ \pm 1/2\rangle$                                                 |
| <b>3a_Dy2</b> | 0.0                | 99% $ \pm 15/2\rangle$                                                                                                                                            |
|               | 110.0              | 15% $ \pm 9/2\rangle$ +16% $ \pm 7/2\rangle$ +19% $ \pm 5/2\rangle$ +17% $ \pm 3/2\rangle$ +16% $ \pm 1/2\rangle$                                                 |
| <b>3a_Dy3</b> | 0.0                | 87% $ \pm 15/2\rangle$                                                                                                                                            |
|               | 46.8               | 22% $ \pm 13/2\rangle$ +10% $ \pm 11/2\rangle$ +17% $ \pm 9/2\rangle$ +14% $ \pm 7/2\rangle$ +13% $ \pm 5/2\rangle$ +10% $ \pm 3/2\rangle$                        |
| <b>3a_Dy4</b> | 0.0                | 99% $ \pm 15/2\rangle$                                                                                                                                            |
|               | 138.0              | 17% $ \pm 13/2\rangle$ +12% $ \pm 11/2\rangle$ +19% $ \pm 9/2\rangle$ +15% $ \pm 7/2\rangle$ +15% $ \pm 5/2\rangle$ +12% $ \pm 3/2\rangle$ +10% $ \pm 1/2\rangle$ |
| <b>3a_Dy5</b> | 0.0                | 97% $ \pm 15/2\rangle$                                                                                                                                            |
|               | 214.6              | 91% $ \pm 13/2\rangle$                                                                                                                                            |
| <b>3a_Dy6</b> | 0.0                | 96% $ \pm 15/2\rangle$                                                                                                                                            |
|               | 182.7              | 90% $ \pm 13/2\rangle$                                                                                                                                            |
| <b>3b_Dy1</b> | 0.0                | 98% $ \pm 15/2\rangle$                                                                                                                                            |
|               | 95.1               | 15% $ \pm 13/2\rangle$ +11% $ \pm 11/2\rangle$ +17% $ \pm 9/2\rangle$ +15% $ \pm 7/2\rangle$ +15% $ \pm 5/2\rangle$ +13% $ \pm 3/2\rangle$ +12% $ \pm 1/2\rangle$ |
| <b>3b_Dy2</b> | 0.0                | 98% $ \pm 15/2\rangle$                                                                                                                                            |
|               | 110.3              | 12% $ \pm 13/2\rangle$ +16% $ \pm 9/2\rangle$ +15% $ \pm 7/2\rangle$ +17% $ \pm 5/2\rangle$ +16% $ \pm 3/2\rangle$ +15% $ \pm 1/2\rangle$                         |
| <b>3b_Dy3</b> | 0.0                | 99% $ \pm 15/2\rangle$                                                                                                                                            |
|               | 138.9              | 11% $ \pm 13/2\rangle$ +14% $ \pm 9/2\rangle$ +14% $ \pm 7/2\rangle$ +17% $ \pm 5/2\rangle$ +18% $ \pm 3/2\rangle$ +18% $ \pm 1/2\rangle$                         |
| <b>3b_Dy4</b> | 0.0                | 97% $ \pm 15/2\rangle$                                                                                                                                            |
|               | 67.5               | 15% $ \pm 9/2\rangle$ +15% $ \pm 7/2\rangle$ +18% $ \pm 5/2\rangle$ +18% $ \pm 3/2\rangle$ +17% $ \pm 1/2\rangle$                                                 |
| <b>3b_Dy5</b> | 0.0                | 96% $ \pm 15/2\rangle$                                                                                                                                            |
|               | 192.7              | 88% $ \pm 13/2\rangle$ +10% $ \pm 9/2\rangle$                                                                                                                     |
| <b>3b_Dy6</b> | 0.0                | 96% $ \pm 15/2\rangle$                                                                                                                                            |
|               | 173.9              | 90% $ \pm 13/2\rangle$                                                                                                                                            |

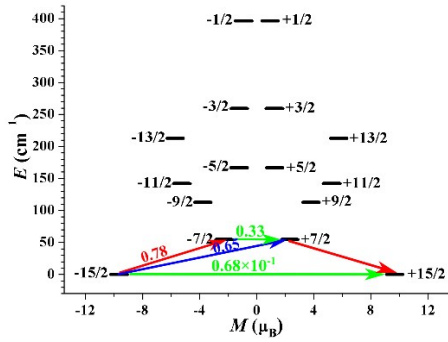

1\_Dy1

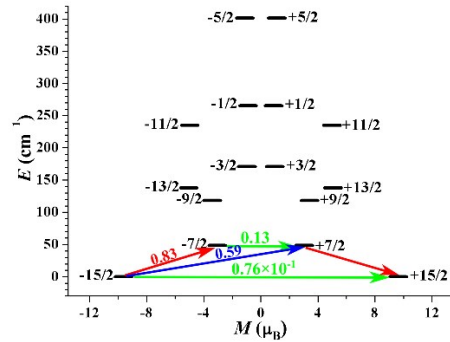

2\_Dy1

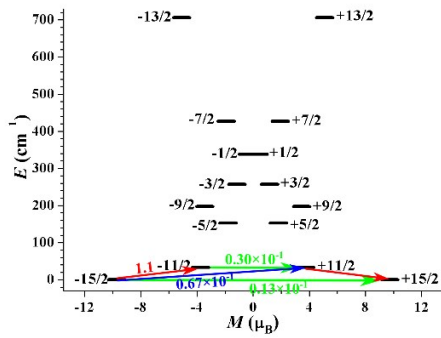

3a\_Dy1

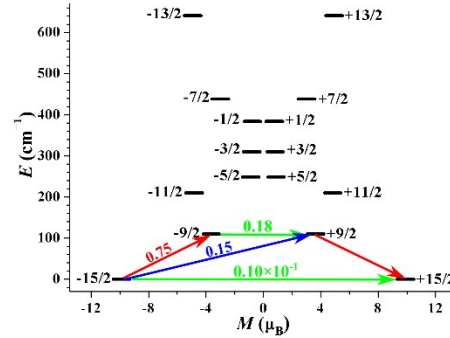

3a\_Dy2

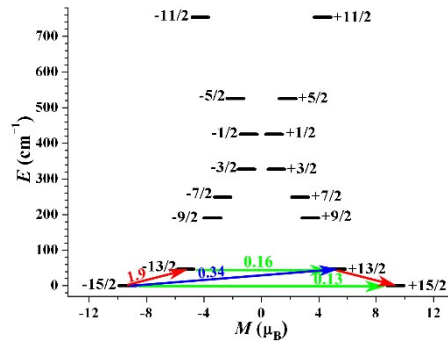

3a\_Dy3

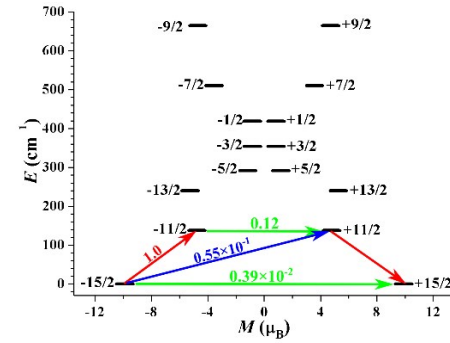

3a\_Dy4

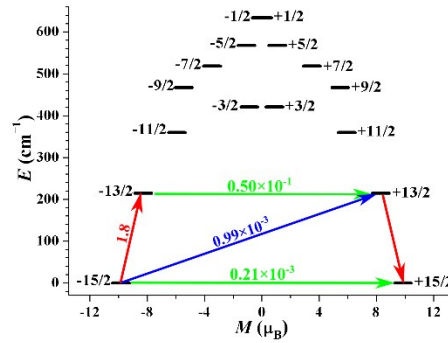

3a\_Dy5

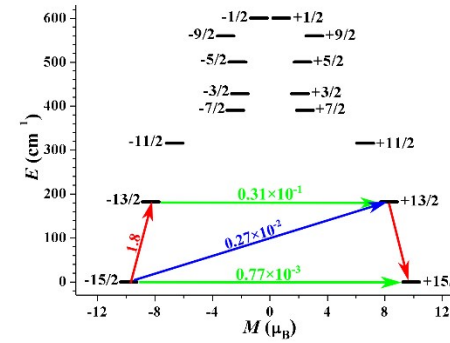

3a\_Dy6

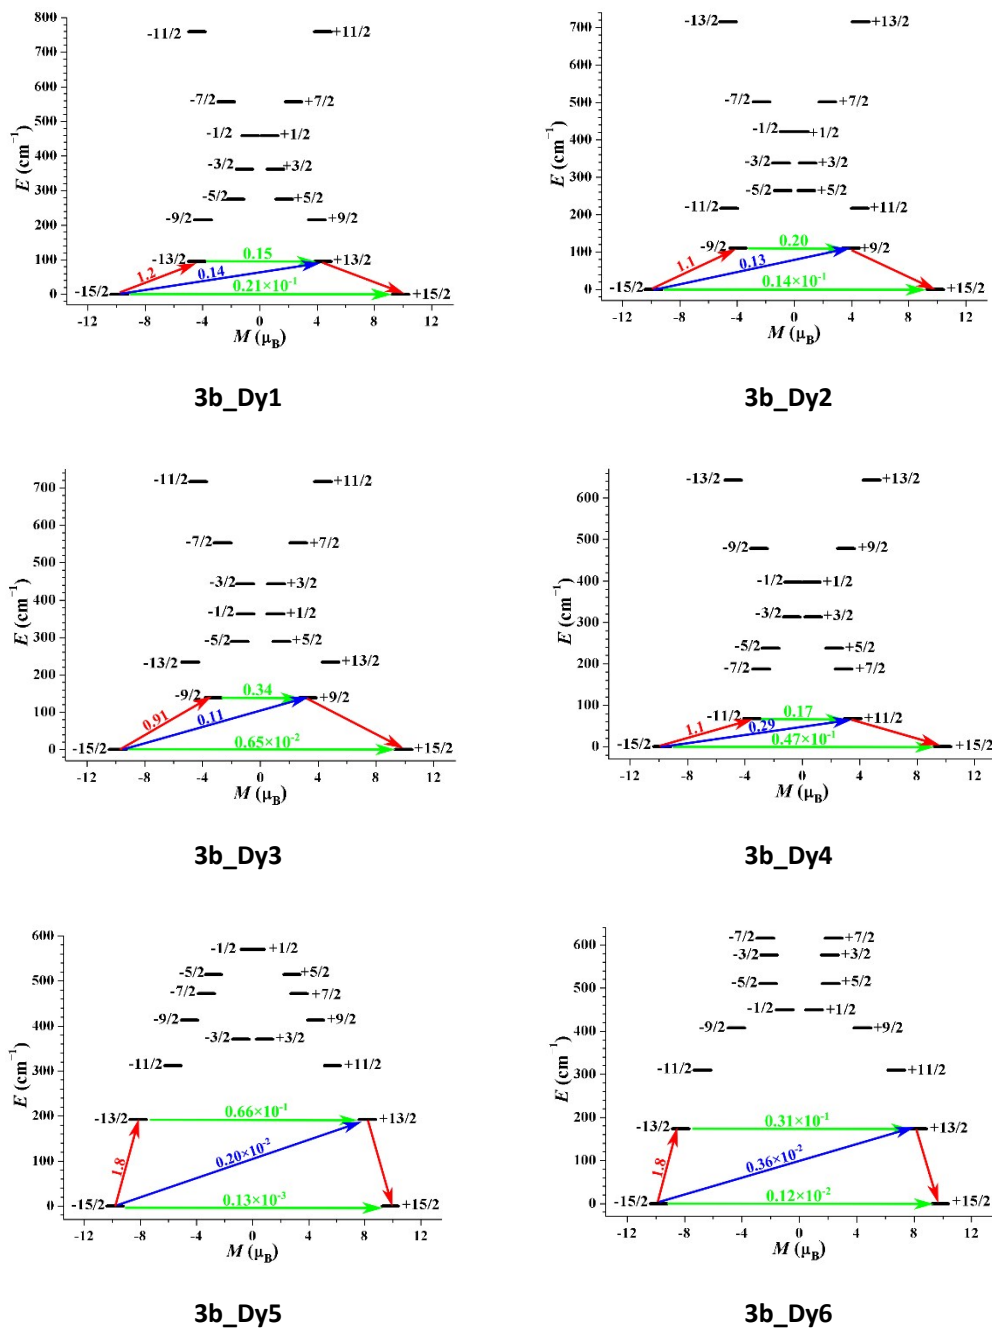

**Figure S14.** Magnetization blocking barriers for individual  $\text{Dy}^{\text{III}}$  fragments in 1–3. The thick black lines represent the KDs of the individual  $\text{Dy}^{\text{III}}$  fragments as a function of their magnetic moment along the magnetic axis. The green lines correspond to diagonal matrix element of the transversal magnetic moment; the blue line represent Orbach relaxation processes. The path shown by the red arrows represents the most probable path for magnetic relaxation in the corresponding compounds. The numbers at each arrow stand for the mean absolute value of the corresponding matrix element of transition magnetic moment.

To fit the exchange interactions between Dy<sup>III</sup> ions in **1** and **2**, we took two steps to obtain them. Firstly, we calculated individual Dy<sup>III</sup> fragments using CASSCF/RASSI-SO to obtain the corresponding magnetic properties. Then, the exchange interactions between the magnetic centers are considered within the Lines model,<sup>S4</sup> while the account of the dipole-dipole magnetic couplings are treated exactly. The Lines model is effective and has been successfully used widely in the research field of *d* and *f*-elements single-molecule magnets.<sup>S5</sup> The Ising exchange Hamiltonians is:

$$\hat{H}_{exch} = -\tilde{J} \hat{S}_{Dy1} \hat{S}_{Dy2} \quad (1)$$

The  $\tilde{J} = 25 \cos \varphi J$ , where  $\varphi$  is the angle between the anisotropy axes on sites Dy1 and Dy2, and  $J$  is the Lines exchange coupling parameter. The  $S_y = 1/2$  is the ground pseudospin on the Dy<sup>III</sup> site. The total  $\tilde{J}_{total}$  is the parameter of the total magnetic interaction ( $\tilde{J}_{total} = \tilde{J}_{dipolar} + \tilde{J}_{exchange}$ ) between magnetic center ions. The dipolar magnetic couplings can be calculated exactly, while the Lines exchange coupling constants  $J$  were fitted through comparison of the computed and measured magnetic susceptibilities using the POLY\_ANISO program.<sup>S3</sup>

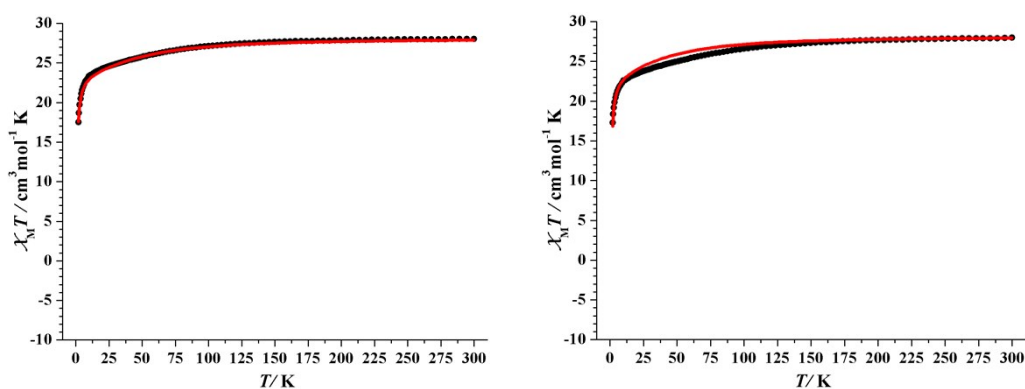

**Figure S15.** Calculated (red solid line) and experimental (black circle dot) data of magnetic susceptibilities of **1** (left) and **2** (right).

**Table S16.** Relevant parameters for the calculation of intermolecular magnetic interactions of **1** and **2**.

|                   | g1z    | g2z    | r1    | $\theta$ | $\psi_1$ | $\psi_2$ |
|-------------------|--------|--------|-------|----------|----------|----------|
| $J_{1\text{dip}}$ | 19.318 | 19.318 | 7.788 | 0        | 54.396   | 54.396   |
| $J_{2\text{dip}}$ | 19.255 | 19.255 | 7.832 | 0        | 57.676   | 57.676   |

**Table S17.** Exchange energies  $E$  ( $\text{cm}^{-1}$ ), the energy difference between each exchange doublets  $\Delta_t$  ( $\text{cm}^{-1}$ ) and the main values of the  $g_z$  for the lowest two exchange doublets of **1–2**.

|   | <b>1</b> |                       |        | <b>2</b> |                       |        |
|---|----------|-----------------------|--------|----------|-----------------------|--------|
|   | $E$      | $\Delta_t$            | $g_z$  | $E$      | $\Delta_t$            | $g_z$  |
| 1 | 0.0      | $5.57 \times 10^{-4}$ | 0.000  | 0.0      | $7.40 \times 10^{-4}$ | 0.000  |
| 2 | 0.8      | $6.06 \times 10^{-4}$ | 38.634 | 0.9      | $8.37 \times 10^{-4}$ | 38.493 |

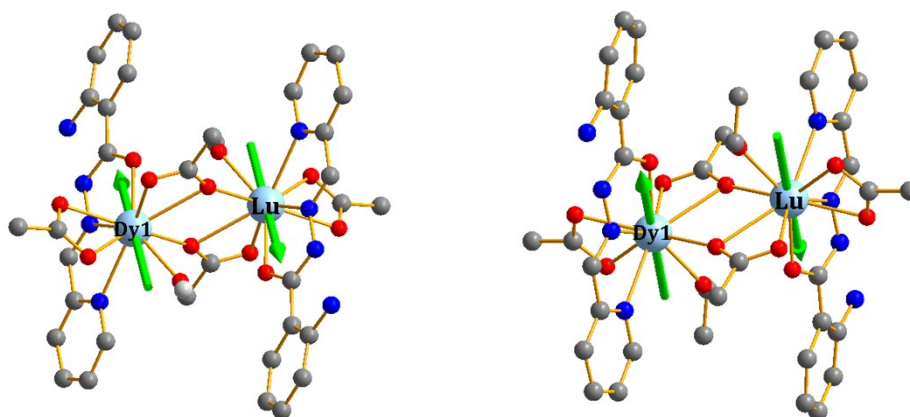

**Figure S16.** Calculated orientations of the local main magnetic axes on  $\text{Dy}^{\text{III}}$  ions of **1** (left) and **2** (right) in the ground KDs

## References:

- S1 F. Aquilante, J. Autschbach, R. K. Carlson, L. F. Chibotaru, M. G. Delcey, L. De Vico, I. Fdez. Galván, N. Ferré, L. M. Frutos, L. Gagliardi, M. Garavelli, A. Giussani, C. E. Hoyer, G. Li Manni, H. Lischka, D. Ma, P. Å. Malmqvist, T. Müller, A. Nenov, M. Olivucci, T. B. Pedersen, D. Peng, F. Plasser, B. Pritchard, M. Reiher, I. Rivalta, I. Schapiro, J. Segarra-Martí, M. Stenrup, D. G. Truhlar, L. Ungur, A. Valentini, S. Vancoillie, V. Veryazov, V. P. Vysotskiy, O. Weingart, F. Zapata and R. Lindh, *J. Comput. Chem.*, 2016, **37**, 506.
- S2 L. Seijo and Z. Barandiarán, *Computational Chemistry: Reviews of Current Trends*; World Scientific, Inc.:



Singapore, 1999; pp 455–152.

- S3 (a) L. F. Chibotaru, L. Ungur, A. Soncini, *Angew. Chem. Int. Ed.*, 2008, **47**, 4126. (b) L. Ungur, W. Van den Heuvel, L. F. Chibotaru, *New J. Chem.*, 2009, **33**, 1224. (c) L. F. Chibotaru, L. Ungur, C. Aronica, H. Elmoll, G. Pilet and D. Luneau, *J. Am. Chem. Soc.*, 2008, **130**, 12445.
- S4 M. E. Lines, *J. Chem. Phys.*, 1971, **55**, 2977.
- S5 (a) K. C. Mondal, A. Sundt, Y. H. Lan, G. E. Kostakis, O. Waldmann, L. Ungur, L. F. Chibotaru, C. E. Anson, A. K. Powell, *Angew. Chem. Int. Ed.*, 2012, **51**, 7550. (b) S. K. Langley, D. P. Wielechowski, V. Vieru, N. F. Chilton, B. Moubaraki, B. F. Abrahams, L. F. Chibotaru and K. S. Murray, *Angew. Chem. Int. Ed.*, 2013, **52**, 12014.

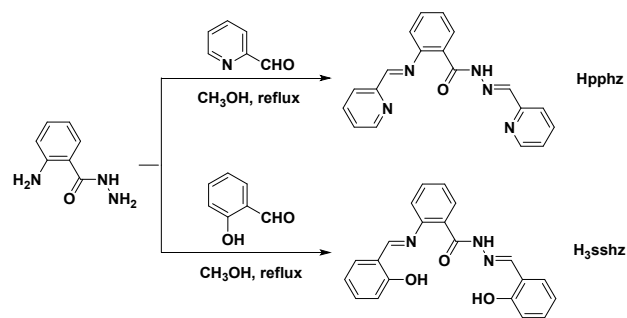

Scheme S1. Synthetic route of the Hpphz and H<sub>3</sub>sshz ligands.

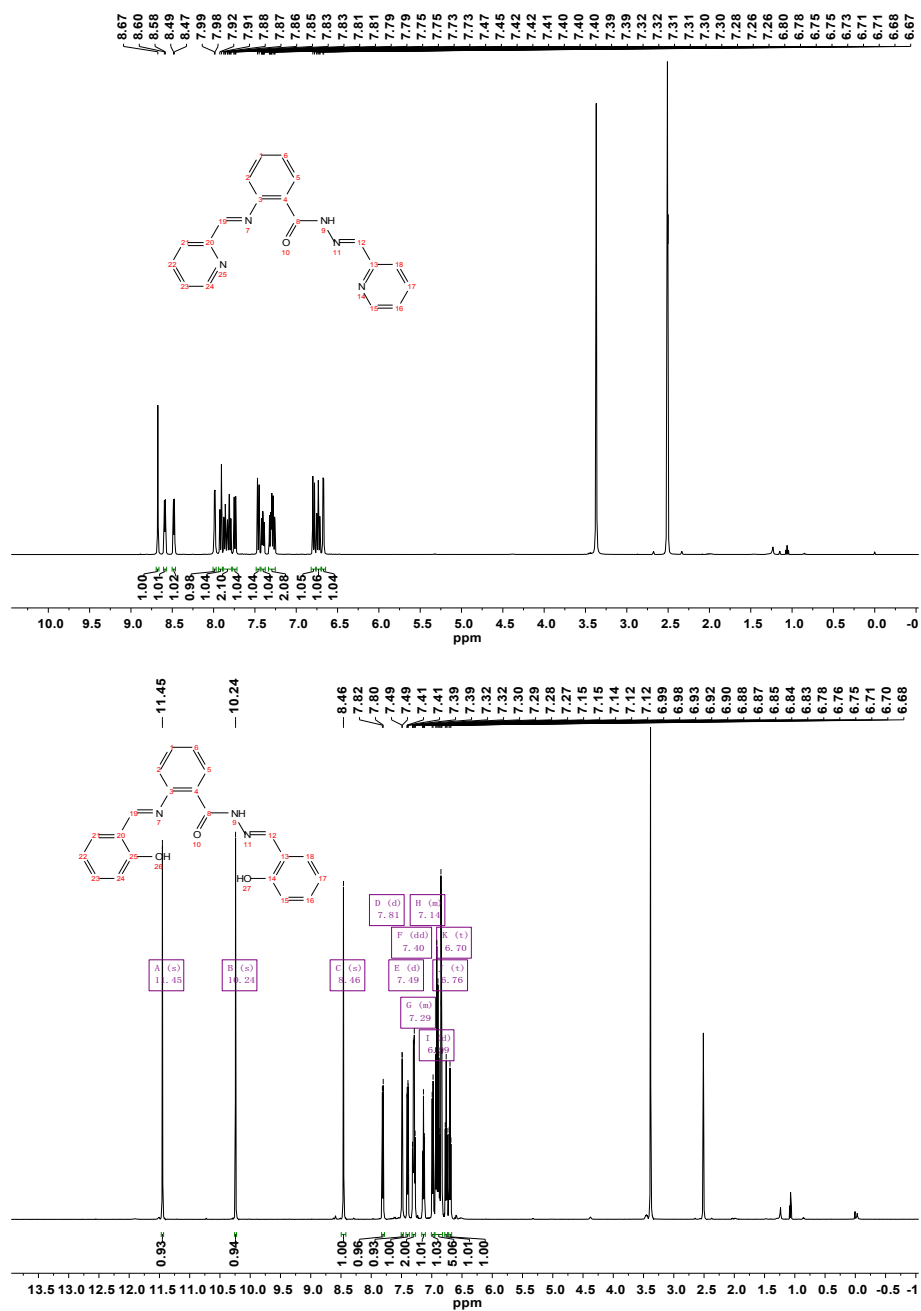

Figure S17. <sup>1</sup>H NMR of the Hpphz (top) and H<sub>3</sub>sshz (down) ligands.

**Table S18.** Dy<sup>III</sup> and Y<sup>III</sup> ion contents of **1@Y** and **2@Y** determined by energy dispersive spectroscopy (EDS) of field-emission scanning electron microscope.

| Sample     | element | first time/% | second time/% | third time/% | mean value/% |
|------------|---------|--------------|---------------|--------------|--------------|
| <b>1@Y</b> | Dy      | 11.38        | 10.15         | 11.07        | 10.83        |
|            | Y       | 88.62        | 89.85         | 88.93        | 89.07        |
| <b>2@Y</b> | Dy      | 7.93         | 7.55          | 9.66         | 8.38         |
|            | Y       | 92.07        | 92.45         | 90.34        | 91.62        |

**Table S19.** Crystal data and structure refinement parameters for **1-3**.

| Identification                                                                           | <b>1</b>                                                                       | <b>2</b>                                                                       | <b>3</b>                                                                               |
|------------------------------------------------------------------------------------------|--------------------------------------------------------------------------------|--------------------------------------------------------------------------------|----------------------------------------------------------------------------------------|
| Formula                                                                                  | C <sub>36</sub> H <sub>42</sub> Dy <sub>2</sub> N <sub>8</sub> O <sub>12</sub> | C <sub>38</sub> H <sub>46</sub> Dy <sub>2</sub> N <sub>8</sub> O <sub>12</sub> | C <sub>193.5</sub> H <sub>226</sub> Dy <sub>12</sub> N <sub>24</sub> O <sub>61.5</sub> |
| <i>F</i> w                                                                               | 1103.77                                                                        | 1131.83                                                                        | 5826.97                                                                                |
| Temp./K                                                                                  | 298.15                                                                         | 302.13                                                                         | 150.0                                                                                  |
| Crystal system                                                                           | triclinic                                                                      | triclinic                                                                      | monoclinic                                                                             |
| Space group                                                                              | <i>P</i> $\bar{1}$                                                             | <i>P</i> $\bar{1}$                                                             | <i>P</i> 2 <sub>1</sub> / <i>n</i>                                                     |
| <i>a</i> /Å                                                                              | 9.4383(5)                                                                      | 9.4259(4)                                                                      | 24.8663(1)                                                                             |
| <i>b</i> /Å                                                                              | 10.7965(6)                                                                     | 10.7569(3)                                                                     | 25.6934(1)                                                                             |
| <i>c</i> /Å                                                                              | 11.0469(4)                                                                     | 11.1938(3)                                                                     | 33.2952(2)                                                                             |
| $\alpha$ /°                                                                              | 109.736(4)                                                                     | 109.174(3)                                                                     | 90                                                                                     |
| $\beta$ /°                                                                               | 100.143(4)                                                                     | 100.065(3)                                                                     | 94.804(2)                                                                              |
| $\gamma$ /°                                                                              | 90.382(5)                                                                      | 90.1607(3)                                                                     | 90                                                                                     |
| <i>V</i> /Å <sup>3</sup>                                                                 | 1040.34(9)                                                                     | 1053.30(6)                                                                     | 21197.6(2)                                                                             |
| <i>Z</i>                                                                                 | 1                                                                              | 1                                                                              | 4                                                                                      |
| <i>D</i> <sub>c</sub> /g cm <sup>-3</sup>                                                | 1.762                                                                          | 1.784                                                                          | 1.824                                                                                  |
| <i>m</i> μ/mm <sup>-1</sup>                                                              | 3.632                                                                          | 3.590                                                                          | 4.258                                                                                  |
| <i>F</i> (000)                                                                           | 542                                                                            | 558                                                                            | 11354                                                                                  |
| Reflns collected                                                                         | 6680                                                                           | 14369                                                                          | 232949                                                                                 |
| <i>R</i> <sub>int</sub>                                                                  | 0.0257                                                                         | 0.0540                                                                         | 0.0956                                                                                 |
| GOF                                                                                      | 1.050                                                                          | 1.044                                                                          | 1.090                                                                                  |
| <i>R</i> <sub>1</sub> , <i>wR</i> <sub>2</sub> ( <i>I</i> > 2σ( <i>I</i> )) <sup>a</sup> | 0.027, 0.052                                                                   | 0.034, 0.085                                                                   | 0.054, 0.120                                                                           |
| <i>R</i> <sub>1</sub> , <i>wR</i> <sub>2</sub> (all data) <sup>b</sup>                   | 0.032, 0.055                                                                   | 0.039, 0.087                                                                   | 0.098, 0.148                                                                           |

$${}^a R_1 = \frac{\sum ||F_o| - |F_c||}{\sum |F_o|}, {}^b wR_2 = \left[ \frac{\sum w(|F_o^2| - |F_c^2|)^2}{\sum w(|F_o^2|)^2} \right]^{1/2}$$

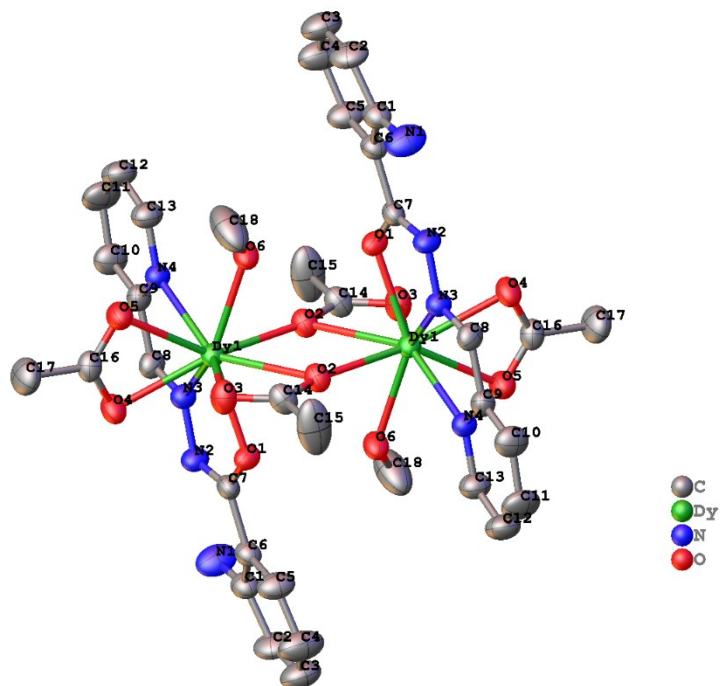

**Figure S18.** Perspective ORTEP drawing of **1** (the hydrogen atoms were omitted for clarity).

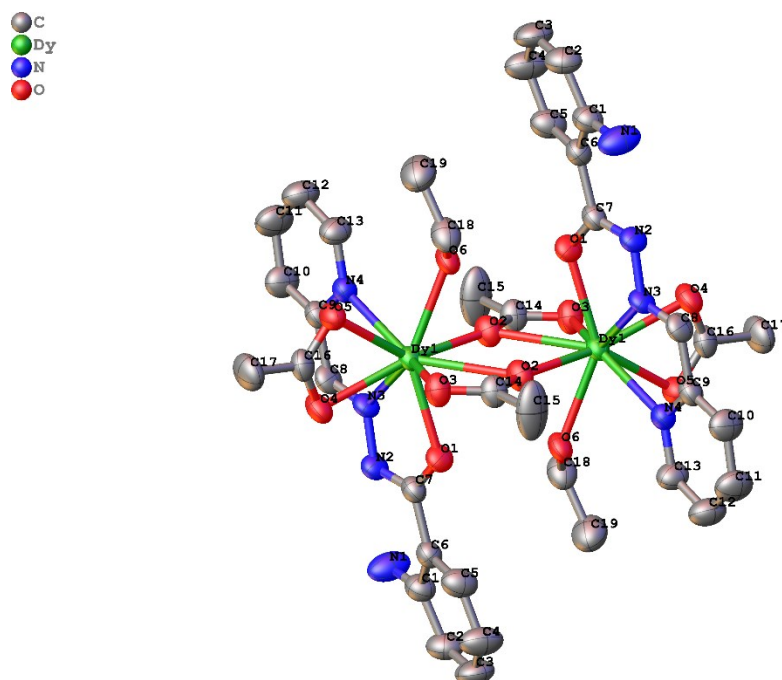

**Figure S19.** Perspective ORTEP drawing of **2** (the hydrogen atoms were omitted for clarity).

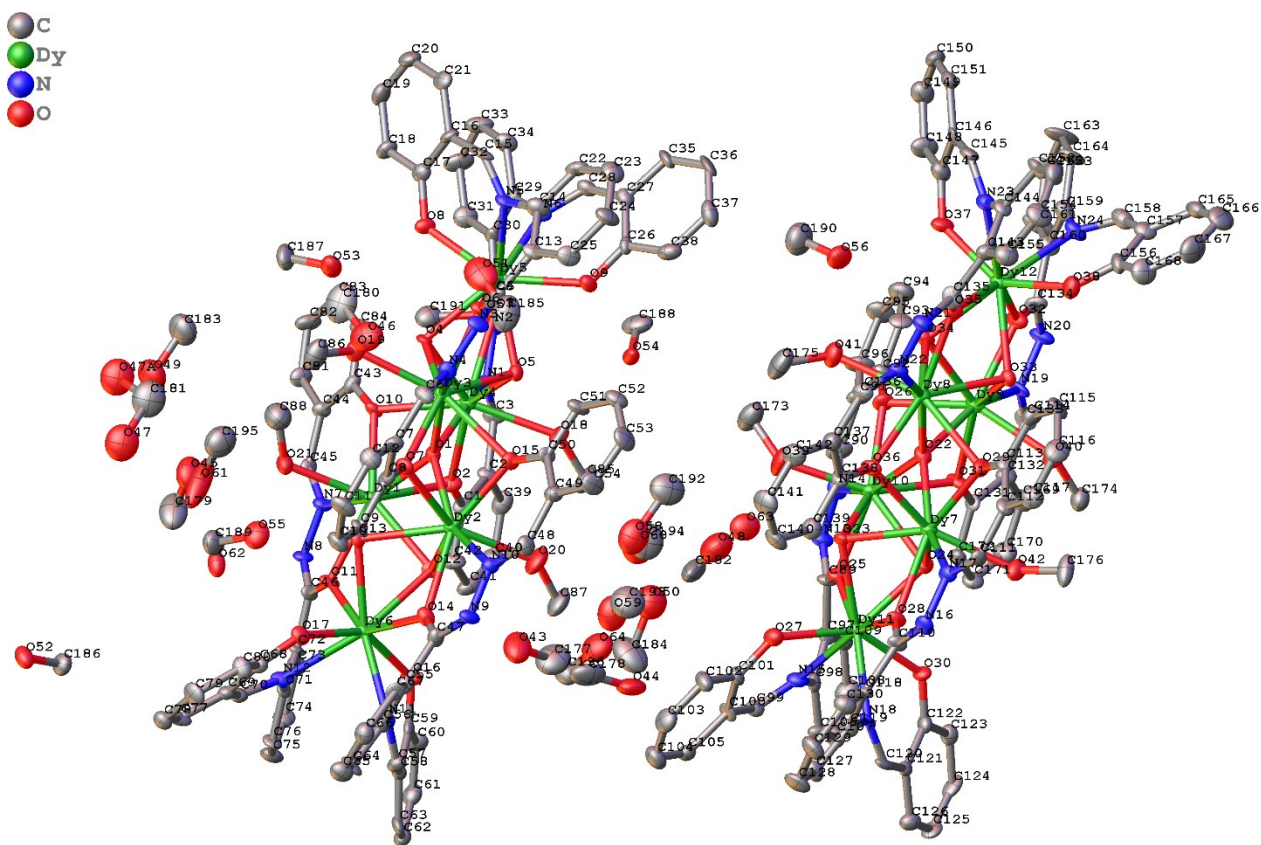

Figure S20. Perspective ORTEP drawing of 3 (the hydrogen atoms were omitted for clarity).

**Table S20.** Selected bond lengths (Å) and angles (°) for **1**.

| <b>Bond</b>       | <b>Length (Å)</b> | <b>Bond</b>       | <b>Length (Å)</b> | <b>Bond</b>       | <b>Length (Å)</b> |
|-------------------|-------------------|-------------------|-------------------|-------------------|-------------------|
| Dy1—O1            | 2.337(3)          | Dy1—O5            | 2.462(3)          | Dy1—O3            | 2.418(3)          |
| Dy1—O2            | 2.346(3)          | Dy1—O6            | 2.416(3)          | Dy1—O4            | 2.388(3)          |
| Dy1—O2a           | 2.639(2)          | Dy1—N3            | 2.483(3)          | Dy1—N4            | 2.590(3)          |
| <b>Bond Angle</b> | <b>Angle (°)</b>  | <b>Bond Angle</b> | <b>Angle (°)</b>  | <b>Bond Angle</b> | <b>Angle (°)</b>  |
| O1—Dy1—O2         | 84.27(9)          | O3—Dy1—O5         | 74.55(1)          | O2—Dy1—N3         | 82.49(1)          |
| O1—Dy1—O2a        | 71.71(8)          | O3—Dy1—N3         | 137.04(1)         | O2—Dy1—N4         | 83.23(1)          |
| O1—Dy1—O3         | 80.64(9)          | O3—Dy1—N4         | 148.89(1)         | O4—Dy1—O2a        | 125.81(9)         |
| O1—Dy1—O4         | 81.95(9)          | N3—Dy1—O2a        | 127.63(1)         | O4—Dy1—O3         | 78.89(1)          |
| O1—Dy1—O5         | 132.13(1)         | N3—Dy1—N4         | 63.33(1)          | O4—Dy1—O5         | 53.68(9)          |
| O1—Dy1—O6         | 143.29(9)         | N4—Dy1—O2a        | 144.33(9)         | O4—Dy1—O6         | 128.45(1)         |
| O1—Dy1—N3         | 63.40(1)          | O5—Dy1—O2a        | 117.68(9)         | O4—Dy1—N3         | 73.74(1)          |
| O1—Dy1—N4         | 126.37(9)         | O5—Dy1—N3         | 112.15(9)         | O4—Dy1—N4         | 89.19(1)          |
| O2—Dy1—O2a        | 67.11(1)          | O5—Dy1—N4         | 75.24(9)          | O6—Dy1—N3         | 137.35(1)         |
| O2—Dy1—O3         | 118.12(9)         | O6—Dy1—O2a        | 73.15(9)          | O6—Dy1—N4         | 79.52(1)          |
| O2—Dy1—O4         | 155.96(1)         | O6—Dy1—O3         | 85.60(9)          | O3—Dy1—O2a        | 51.13(8)          |
| O2—Dy1—O5         | 143.59(1)         | O6—Dy1—O5         | 74.85(9)          | O2—Dy1—O6         | 72.56(9)          |

a:  $-x+1, -y+1, -z+1$ .**Table S21.** Selected bond lengths (Å) and angles (°) for **2**.

| <b>Bond</b>       | <b>Length (Å)</b> | <b>Bond</b>       | <b>Length (Å)</b> | <b>Bond</b>            | <b>Length (Å)</b> |
|-------------------|-------------------|-------------------|-------------------|------------------------|-------------------|
| Dy1—O1            | 2.339(4)          | Dy1—O3a           | 2.409(4)          | Dy1—O6                 | 2.422(3)          |
| Dy1—O2a           | 2.667(4)          | Dy1—O4            | 2.396(3)          | Dy1—N3                 | 2.477(4)          |
| Dy1—O2            | 2.345(3)          | Dy1—O5            | 2.445(3)          | Dy1—N4                 | 2.583(4)          |
| <b>Bond Angle</b> | <b>Angle (°)</b>  | <b>Bond Angle</b> | <b>Angle (°)</b>  | <b>Bond Angle</b>      | <b>Angle (°)</b>  |
| O1—Dy1—O2         | 85.34(1)          | O2—Dy1—N3         | 83.01(1)          | O4—Dy1—N4              | 88.38(1)          |
| O1—Dy1—O2a        | 71.93(1)          | O2—Dy1—N4         | 83.58(1)          | O5—Dy1—O2a             | 116.66(1)         |
| O1—Dy1—O3a        | 80.46(1)          | O3a—Dy1—O2a       | 50.46(1)          | O5—Dy1—N3              | 112.42(1)         |
| O1—Dy1—O4         | 81.73(1)          | O3a—Dy1—O5        | 74.15(1)          | O5—Dy1—N4              | 75.20(1)          |
| O1—Dy1—O5         | 131.75(1)         | O3a—Dy1—O6        | 85.06(1)          | O6—Dy1—O2a             | 72.97(1)          |
| O1—Dy1—O6         | 143.46(1)         | O3a—Dy1—N3        | 137.37(1)         | O6—Dy1—O5              | 74.36(1)          |
| O1—Dy1—N3         | 63.80(1)          | O3a—Dy1—N4        | 148.57(1)         | O6—Dy1—N3              | 137.55(1)         |
| O1—Dy1—N4         | 126.45(1)         | O4—Dy1—O2a        | 125.52(1)         | O6—Dy1—N4              | 80.17(1)          |
| O2—Dy1—O3a        | 117.99(1)         | O4—Dy1—O3a        | 79.16(1)          | N3—Dy1—O2 <sup>a</sup> | 128.31(1)         |
| O2—Dy1—O4         | 156.46(1)         | O4—Dy1—O5         | 53.83(1)          | N3—Dy1—N4              | 62.91(1)          |
| O2—Dy1—O5         | 142.87(1)         | O4—Dy1—O6         | 128.12(1)         | N4—Dy1—O2a             | 145.30(1)         |
| O2—Dy1—O6         | 72.21(1)          | O4—Dy1—N3         | 73.64(1)          | Dy1—O2—Dy1a            | 112.30(1)         |

a:  $-x+1, -y+1, -z+1$ .

**Table S22.** Selected bond lengths (Å) and angles (°) for **3**.

| <b>Bond</b>       | <b>Length (Å)</b> | <b>Bond</b>       | <b>Length (Å)</b> | <b>Bond</b>       | <b>Length (Å)</b> |
|-------------------|-------------------|-------------------|-------------------|-------------------|-------------------|
| Dy1—O1            | 2.296(6)          | Dy5—O3            | 2.365(6)          | Dy9—O22           | 2.257(7)          |
| Dy1—O2            | 2.421(7)          | Dy5—O4            | 2.380(6)          | Dy9—O26           | 2.466(7)          |
| Dy1—O10           | 2.351(6)          | Dy5—O5            | 2.369(7)          | Dy9—O31           | 2.357(6)          |
| Dy1—O11           | 2.356(6)          | Dy5—O6            | 2.366(6)          | Dy9—O32           | 2.357(7)          |
| Dy1—O12           | 2.378(7)          | Dy5—O8            | 2.254(7)          | Dy9—O33           | 2.341(6)          |
| Dy1—O13           | 2.319(6)          | Dy5—O9            | 2.253(7)          | Dy9—O34           | 2.379(7)          |
| Dy1—O21           | 2.393(7)          | Dy5—N5            | 2.516(8)          | Dy9—O40           | 2.361(8)          |
| Dy1—N7            | 2.485(8)          | Dy5—N6            | 2.510(8)          | Dy9—N19           | 2.499(8)          |
| Dy2—O1            | 2.284(6)          | Dy6—O11           | 2.384(6)          | Dy10—O22          | 2.271(6)          |
| Dy2—O7            | 2.440(6)          | Dy6—O12           | 2.395(7)          | Dy10—O23          | 2.328(6)          |
| Dy2—O12           | 2.333(6)          | Dy6—O13           | 2.376(6)          | Dy10—O24          | 2.410(6)          |
| Dy2—O13           | 2.431(6)          | Dy6—O14           | 2.368(7)          | Dy10—O25          | 2.367(6)          |
| Dy2—O14           | 2.352(7)          | Dy6—O16           | 2.234(7)          | Dy10—O26          | 2.326(7)          |
| Dy2—O15           | 2.335(7)          | Dy6—O17           | 2.252(7)          | Dy10—O31          | 2.406(7)          |
| Dy2—O20           | 2.365(8)          | Dy6—N11           | 2.499(8)          | Dy10—O39          | 2.385(8)          |
| Dy2—N10           | 2.482(8)          | Dy6—N12           | 2.556(8)          | Dy10—N14          | 2.490(8)          |
| Dy3—O1            | 2.295(6)          | Dy7—O22           | 2.263(7)          | Dy11—O23          | 2.418(6)          |
| Dy3—O4            | 2.329(6)          | Dy7—O23           | 2.434(7)          | Dy11—O24          | 2.346(7)          |
| Dy3—O5            | 2.422(7)          | Dy7—O24           | 2.314(6)          | Dy11—O25          | 2.359(7)          |
| Dy3—O6            | 2.349(6)          | Dy7—O28           | 2.366(6)          | Dy11—O27          | 2.260(7)          |
| Dy3—O7            | 2.319(6)          | Dy7—O29           | 2.316(7)          | Dy11—O28          | 2.349(6)          |
| Dy3—O15           | 2.409(7)          | Dy7—O36           | 2.448(7)          | Dy11—O30          | 2.267(7)          |
| Dy3—O19           | 2.414(7)          | Dy7—O42           | 2.406(7)          | Dy11—N15          | 2.534(8)          |
| Dy3—N4            | 2.494(8)          | Dy7—N17           | 2.462(8)          | Dy11—N18          | 2.493(8)          |
| Dy4—O1            | 2.259(6)          | Dy8—O22           | 2.275(6)          | Dy12—O32          | 2.397(7)          |
| Dy4—O2            | 2.336(7)          | Dy8—O29           | 2.433(7)          | Dy12—O33          | 2.376(6)          |
| Dy4—O3            | 2.355(6)          | Dy8—O33           | 2.405(6)          | Dy12—O34          | 2.377(7)          |
| Dy4—O4            | 2.413(6)          | Dy8—O34           | 2.332(6)          | Dy12—O35          | 2.371(7)          |
| Dy4—O5            | 2.313(6)          | Dy8—O35           | 2.348(7)          | Dy12—O37          | 2.256(7)          |
| Dy4—O10           | 2.406(7)          | Dy8—O36           | 2.342(6)          | Dy12—O38          | 2.210(8)          |
| Dy4—O18           | 2.390(7)          | Dy8—O41           | 2.421(8)          | Dy12—N23          | 2.535(8)          |
| Dy4—N1            | 2.494(8)          | Dy8—N22           | 2.494(8)          | Dy12—N24          | 2.554(9)          |
| <b>Bond Angle</b> | <b>Angle (°)</b>  | <b>Bond Angle</b> | <b>Angle (°)</b>  | <b>Bond Angle</b> | <b>Angle (°)</b>  |
| O1—Dy1—O2         | 75.7(2)           | O8—Dy5—N5         | 74.1(3)           | O31—Dy9—O40       | 78.6(3)           |
| O1—Dy1—O10        | 76.6(2)           | O8—Dy5—N6         | 82.9(3)           | O31—Dy9—N19       | 72.7(2)           |
| O1—Dy1—O11        | 144.7(2)          | O9—Dy5—O3         | 99.9(2)           | O32—Dy9—O26       | 109.5(2)          |
| O1—Dy1—O12        | 77.3(2)           | O9—Dy5—O4         | 137.2(2)          | O32—Dy9—O34       | 71.1(2)           |
| O1—Dy1—O13        | 77.1(2)           | O9—Dy5—O5         | 75.6(2)           | O32—Dy9—O40       | 98.3(3)           |
| O1—Dy1—O21        | 106.1(2)          | O9—Dy5—O6         | 90.9(2)           | O32—Dy9—N19       | 64.1(2)           |
| O1—Dy1—N7         | 150.0(2)          | O9—Dy5—O8         | 148.2(2)          | O33—Dy9—O26       | 131.6(2)          |
| O2—Dy1—N7         | 84.3(3)           | O9—Dy5—N5         | 82.8(3)           | O33—Dy9—O31       | 143.3(2)          |

|             |            |             |          |              |          |
|-------------|------------|-------------|----------|--------------|----------|
| O10—Dy1—O2  | 68.6(2)    | O9—Dy5—N6   | 73.4(3)  | O33—Dy9—O32  | 72.4(2)  |
| O10—Dy1—O11 | 138.8(2)   | N6—Dy5—N5   | 84.7(3)  | O33—Dy9—O34  | 61.3(2)  |
| O10—Dy1—O12 | 140.7(2)   | O11—Dy6—O12 | 70.9(2)  | O33—Dy9—O40  | 74.5(2)  |
| O10—Dy1—O21 | 77.2(2)    | O11—Dy6—N11 | 150.1(2) | O33—Dy9—N19  | 126.3(3) |
| O10—Dy1—N7  | 75.4(2)    | O11—Dy6—N12 | 68.6(2)  | O34—Dy9—O26  | 73.5(2)  |
| O11—Dy1—O2  | 112.3(2)   | O12—Dy6—N11 | 122.2(2) | O34—Dy9—N19  | 125.1(2) |
| O11—Dy1—O12 | 71.7(2)    | O12—Dy6—N12 | 135.7(2) | O40—Dy9—O26  | 146.1(2) |
| O11—Dy1—O21 | 87.0(2)    | O13—Dy6—O11 | 72.3(2)  | O40—Dy9—O34  | 135.8(2) |
| O11—Dy1—N7  | 64.0(2)    | O13—Dy6—O12 | 61.3(2)  | O40—Dy9—N19  | 82.0(3)  |
| O12—Dy1—O2  | 76.8(2)    | O13—Dy6—N11 | 137.3(2) | O22—Dy10—O23 | 78.4(2)  |
| O12—Dy1—O21 | 138.7(2)   | O13—Dy6—N12 | 119.7(2) | O22—Dy10—O24 | 75.0(2)  |
| O12—Dy1—N7  | 119.8(2)   | O14—Dy6—O11 | 137.6(2) | O22—Dy10—O25 | 142.7(2) |
| O13—Dy1—O2  | 134.8(2)   | O14—Dy6—O12 | 72.2(2)  | O22—Dy10—O26 | 76.8(2)  |
| O13—Dy1—O10 | 136.8(2)   | O14—Dy6—O13 | 72.1(2)  | O22—Dy10—O31 | 77.4(2)  |
| O13—Dy1—O11 | 73.8(2)    | O14—Dy6—N11 | 70.1(2)  | O22—Dy10—O39 | 106.7(3) |
| O13—Dy1—O12 | 62.4(2)    | O14—Dy6—N12 | 151.9(2) | O22—Dy10—N14 | 149.5(3) |
| O13—Dy1—O21 | 78.0(2)    | O16—Dy6—O11 | 85.4(2)  | O23—Dy10—O24 | 61.7(2)  |
| O13—Dy1—N7  | 131.9(2)   | O16—Dy6—O12 | 75.2(2)  | O23—Dy10—O25 | 74.5(2)  |
| O21—Dy1—O2  | 144.5(2)   | O16—Dy6—O13 | 135.5(2) | O23—Dy10—O31 | 133.7(2) |
| O21—Dy1—N7  | 77.8(3)    | O16—Dy6—O14 | 104.7(3) | O23—Dy10—O39 | 74.3(3)  |
| O1—Dy2—O7   | 76.4(2)    | O16—Dy6—O17 | 145.8(2) | O23—Dy10—N14 | 131.5(3) |
| O1—Dy2—O12  | 78.5(2)    | O16—Dy6—N11 | 74.0(3)  | O24—Dy10—N14 | 121.1(3) |
| O1—Dy2—O13  | 75.1(2)    | O16—Dy6—N12 | 84.4(3)  | O25—Dy10—O24 | 69.8(2)  |
| O1—Dy2—O14  | 143.8(2)   | O17—Dy6—O11 | 109.2(2) | O25—Dy10—O31 | 103.8(2) |
| O1—Dy2—O15  | 76.9(2)    | O17—Dy6—O12 | 138.3(2) | O25—Dy10—O39 | 90.1(3)  |
| O1—Dy2—O20  | 105.6(3)   | O17—Dy6—O13 | 78.6(2)  | O25—Dy10—N14 | 64.5(3)  |
| O1—Dy2—N10  | 149.7(2)   | O17—Dy6—O14 | 85.4(2)  | O26—Dy10—O23 | 139.8(2) |
| O7—Dy2—N10  | 83.9(2)    | O17—Dy6—N11 | 79.3(3)  | O26—Dy10—O24 | 137.9(2) |
| O12—Dy2—O7  | 134.9(2)   | O17—Dy6—N12 | 73.4(2)  | O26—Dy10—O25 | 139.3(2) |
| O12—Dy2—O13 | 61.4(2)    | N11—Dy6—N12 | 87.7(3)  | O26—Dy10—O31 | 69.5(2)  |
| O12—Dy2—O14 | 73.7(2)    | Dy1—O1—Dy3  | 144.8(3) | O26—Dy10—O39 | 83.2(3)  |
| O12—Dy2—O15 | 138.6(2)   | Dy2—O1—Dy1  | 96.1(2)  | O26—Dy10—N14 | 74.8(3)  |
| O12—Dy2—O20 | 75.8(3)    | Dy2—O1—Dy3  | 94.1(2)  | O31—Dy10—O24 | 74.2(2)  |
| O12—Dy2—N10 | 130.8(2)   | Dy4—O1—Dy1  | 95.0(2)  | O31—Dy10—N14 | 82.5(3)  |
| O13—Dy2—O7  | 76.2(2)    | Dy4—O1—Dy2  | 141.9(3) | O39—Dy10—O24 | 134.9(3) |
| O13—Dy2—N10 | 122.4(2)   | Dy4—O1—Dy3  | 97.5(2)  | O39—Dy10—O31 | 150.9(3) |
| O14—Dy2—Dy1 | 102.08(16) | Dy4—O2—Dy1  | 89.7(2)  | O39—Dy10—N14 | 80.7(3)  |
| O14—Dy2—O7  | 108.0(2)   | Dy4—O3—Dy5  | 98.6(2)  | O23—Dy11—N15 | 125.9(2) |
| O14—Dy2—O13 | 71.4(2)    | Dy3—O4—Dy4  | 92.4(2)  | O23—Dy11—N18 | 134.0(2) |
| O14—Dy2—O20 | 89.7(3)    | Dy3—O4—Dy5  | 98.6(2)  | O24—Dy11—O23 | 61.3(2)  |
| O14—Dy2—N10 | 64.4(2)    | Dy5—O4—Dy4  | 96.6(2)  | O24—Dy11—O25 | 71.0(2)  |
| O15—Dy2—O7  | 69.1(2)    | Dy4—O5—Dy3  | 92.6(2)  | O24—Dy11—O28 | 73.3(2)  |
| O15—Dy2—O13 | 139.5(2)   | Dy4—O5—Dy5  | 99.7(2)  | O24—Dy11—N15 | 133.6(2) |



|             |          |             |          |              |            |
|-------------|----------|-------------|----------|--------------|------------|
| O15—Dy2—O14 | 139.0(2) | Dy5—O5—Dy3  | 96.3(2)  | O24—Dy11—N18 | 124.8(2)   |
| O15—Dy2—O20 | 79.4(3)  | Dy3—O6—Dy5  | 98.4(2)  | O25—Dy11—O23 | 73.0(2)    |
| O15—Dy2—N10 | 74.6(2)  | Dy3—O7—Dy2  | 89.5(2)  | O25—Dy11—N15 | 69.6(2)    |
| O20—Dy2—O7  | 147.3(3) | Dy1—O10—Dy4 | 89.7(2)  | O25—Dy11—N18 | 151.9(2)   |
| O20—Dy2—O13 | 136.4(3) | Dy1—O11—Dy6 | 98.1(2)  | O27—Dy11—O23 | 77.9(2)    |
| O20—Dy2—N10 | 79.2(3)  | Dy1—O12—Dy6 | 97.2(3)  | O27—Dy11—O24 | 139.1(2)   |
| O1—Dy3—O4   | 76.0(2)  | Dy2—O12—Dy1 | 92.6(2)  | O27—Dy11—O25 | 101.2(3)   |
| O1—Dy3—O5   | 75.5(2)  | Dy2—O12—Dy6 | 98.8(2)  | O27—Dy11—O28 | 90.6(3)    |
| O1—Dy3—O6   | 142.5(2) | Dy1—O13—Dy2 | 91.6(2)  | O27—Dy11—O30 | 145.2(2)   |
| O1—Dy3—O7   | 78.6(2)  | Dy1—O13—Dy6 | 99.3(2)  | O27—Dy11—N15 | 72.8(3)    |
| O1—Dy3—O15  | 75.2(2)  | Dy6—O13—Dy2 | 96.6(2)  | O27—Dy11—N18 | 81.2(3)    |
| O1—Dy3—O19  | 108.6(2) | Dy2—O14—Dy6 | 99.0(2)  | O28—Dy11—O23 | 69.5(2)    |
| O1—Dy3—N4   | 151.4(2) | Dy2—O15—Dy3 | 89.9(2)  | O28—Dy11—O25 | 137.2(2)   |
| O4—Dy3—O5   | 61.6(2)  | O22—Dy7—O23 | 76.4(2)  | O28—Dy11—N15 | 152.0(2)   |
| O4—Dy3—O6   | 75.6(2)  | O22—Dy7—O24 | 77.1(2)  | O28—Dy11—N18 | 70.2(2)    |
| O4—Dy3—O15  | 132.0(2) | O22—Dy7—O28 | 142.2(2) | O30—Dy11—O23 | 136.9(2)   |
| O4—Dy3—O19  | 73.1(2)  | O22—Dy7—O29 | 77.6(2)  | O30—Dy11—O24 | 75.7(2)    |
| O4—Dy3—N4   | 131.5(2) | O22—Dy7—O36 | 75.1(2)  | O30—Dy11—O25 | 90.7(2)    |
| O5—Dy3—N4   | 121.3(2) | O22—Dy7—O42 | 107.2(3) | O30—Dy11—O28 | 102.7(2)   |
| O6—Dy3—O5   | 69.7(2)  | O22—Dy7—N17 | 151.1(3) | O30—Dy11—N15 | 81.2(3)    |
| O6—Dy3—O15  | 107.4(2) | O23—Dy7—O36 | 76.3(2)  | O30—Dy11—N18 | 73.6(3)    |
| O6—Dy3—O19  | 85.7(2)  | O23—Dy7—N17 | 120.9(2) | N18—Dy11—N15 | 84.7(3)    |
| O6—Dy3—N4   | 63.9(2)  | O24—Dy7—O23 | 61.5(2)  | O32—Dy12—N23 | 151.4(3)   |
| O7—Dy3—O4   | 138.6(2) | O24—Dy7—O28 | 73.5(2)  | O32—Dy12—N24 | 69.2(3)    |
| O7—Dy3—O5   | 140.1(2) | O24—Dy7—O29 | 137.7(2) | O33—Dy12—O32 | 71.1(2)    |
| O7—Dy3—O6   | 138.3(2) | O24—Dy7—O36 | 133.7(2) | O33—Dy12—O34 | 60.9(2)    |
| O7—Dy3—O15  | 69.9(2)  | O24—Dy7—O42 | 73.5(2)  | O33—Dy12—N23 | 137.3(2)   |
| O7—Dy3—O19  | 84.8(2)  | O24—Dy7—N17 | 130.8(2) | O33—Dy12—N24 | 117.5(3)   |
| O7—Dy3—N4   | 74.3(2)  | O28—Dy7—O23 | 69.0(2)  | O34—Dy12—O32 | 70.4(2)    |
| O15—Dy3—O5  | 74.4(2)  | O28—Dy7—O36 | 109.6(2) | O34—Dy12—N23 | 121.7(3)   |
| O15—Dy3—O19 | 153.4(2) | O28—Dy7—O42 | 86.7(3)  | O34—Dy12—N24 | 136.8(2)   |
| O15—Dy3—N4  | 86.9(2)  | O28—Dy7—N17 | 64.9(2)  | O35—Dy12—O32 | 136.4(2)   |
| O19—Dy3—O5  | 132.2(2) | O29—Dy7—O23 | 141.1(2) | O35—Dy12—O33 | 71.8(2)    |
| O19—Dy3—N4  | 78.1(3)  | O29—Dy7—O28 | 139.9(2) | O35—Dy12—O34 | 72.0(2)    |
| O1—Dy4—O2   | 78.1(2)  | O29—Dy7—O36 | 69.4(2)  | O35—Dy12—N23 | 70.0(3)    |
| O1—Dy4—O3   | 142.8(2) | O29—Dy7—O42 | 82.4(2)  | O35—Dy12—N24 | 151.2(3)   |
| O1—Dy4—O4   | 75.1(2)  | O29—Dy7—N17 | 75.1(3)  | O37—Dy12—Dy8 | 108.38(19) |
| O1—Dy4—O5   | 78.4(2)  | O36—Dy7—N17 | 86.2(2)  | O37—Dy12—Dy9 | 100.26(17) |
| O1—Dy4—O10  | 76.2(2)  | O42—Dy7—O23 | 133.0(2) | O37—Dy12—O32 | 86.1(3)    |
| O1—Dy4—O18  | 103.2(3) | O42—Dy7—O36 | 150.6(2) | O37—Dy12—O33 | 136.1(2)   |
| O1—Dy4—N1   | 151.8(2) | O42—Dy7—N17 | 78.7(3)  | O37—Dy12—O34 | 76.5(2)    |
| O2—Dy4—O3   | 138.3(2) | O22—Dy8—O29 | 75.0(2)  | O37—Dy12—O35 | 105.9(3)   |
| O2—Dy4—O4   | 140.1(2) | O22—Dy8—O33 | 77.4(2)  | O37—Dy12—N23 | 73.4(3)    |

|             |          |             |          |               |          |
|-------------|----------|-------------|----------|---------------|----------|
| O2—Dy4—O10  | 69.1(2)  | O22—Dy8—O34 | 77.1(2)  | O37—Dy12—N24  | 86.1(3)  |
| O2—Dy4—O18  | 81.3(2)  | O22—Dy8—O35 | 144.6(2) | O38—Dy12—Dy8  | 100.8(2) |
| O2—Dy4—N1   | 74.7(2)  | O22—Dy8—O36 | 77.0(2)  | O38—Dy12—Dy9  | 113.2(2) |
| O3—Dy4—O4   | 69.8(2)  | O22—Dy8—O41 | 100.7(3) | O38—Dy12—O32  | 111.3(3) |
| O3—Dy4—O10  | 106.3(2) | O22—Dy8—N22 | 151.3(2) | O38—Dy12—O33  | 79.6(3)  |
| O3—Dy4—O18  | 92.3(3)  | O29—Dy8—N22 | 92.0(2)  | O38—Dy12—O34  | 138.1(2) |
| O3—Dy4—N1   | 63.7(2)  | O33—Dy8—O29 | 74.0(2)  | O38—Dy12—O35  | 83.4(3)  |
| O4—Dy4—N1   | 123.3(2) | O33—Dy8—O41 | 132.8(2) | O38—Dy12—O37  | 144.2(3) |
| O5—Dy4—O2   | 139.1(2) | O33—Dy8—N22 | 124.2(2) | O38—Dy12—N23  | 77.9(3)  |
| O5—Dy4—O3   | 74.5(2)  | O34—Dy8—O29 | 131.1(2) | O38—Dy12—N24  | 72.5(3)  |
| O5—Dy4—O4   | 61.9(2)  | O34—Dy8—O33 | 61.1(2)  | N23—Dy12—N24  | 89.3(3)  |
| O5—Dy4—O10  | 135.1(2) | O34—Dy8—O35 | 73.2(2)  | Dy7—O22—Dy8   | 95.7(2)  |
| O5—Dy4—O18  | 72.1(2)  | O34—Dy8—O36 | 139.8(2) | Dy7—O22—Dy10  | 97.5(2)  |
| O5—Dy4—N1   | 128.0(3) | O34—Dy8—O41 | 72.4(3)  | Dy9—O22—Dy7   | 139.4(3) |
| O10—Dy4—O4  | 76.0(2)  | O34—Dy8—N22 | 128.3(2) | Dy9—O22—Dy8   | 96.5(2)  |
| O10—Dy4—N1  | 87.3(2)  | O35—Dy8—O29 | 111.3(2) | Dy9—O22—Dy10  | 95.6(2)  |
| O18—Dy4—O4  | 133.5(2) | O35—Dy8—O33 | 71.6(2)  | Dy10—O22—Dy8  | 142.9(3) |
| O18—Dy4—O10 | 149.9(2) | O35—Dy8—O41 | 88.4(3)  | Dy10—O23—Dy7  | 91.4(2)  |
| O18—Dy4—N1  | 79.9(3)  | O35—Dy8—N22 | 63.9(2)  | Dy10—O23—Dy11 | 98.2(2)  |
| O3—Dy5—O4   | 70.2(2)  | O36—Dy8—O29 | 69.3(2)  | Dy11—O23—Dy7  | 95.8(2)  |
| O3—Dy5—O5   | 73.3(2)  | O36—Dy8—O33 | 139.4(2) | Dy7—O24—Dy10  | 92.3(2)  |
| O3—Dy5—O6   | 137.9(2) | O36—Dy8—O35 | 138.3(2) | Dy7—O24—Dy11  | 101.1(3) |
| O3—Dy5—N5   | 152.1(2) | O36—Dy8—O41 | 82.8(3)  | Dy11—O24—Dy10 | 98.0(3)  |
| O3—Dy5—N6   | 69.8(2)  | O36—Dy8—N22 | 74.4(2)  | Dy11—O25—Dy10 | 98.8(2)  |
| O4—Dy5—N5   | 125.5(2) | O41—Dy8—O29 | 152.1(3) | Dy10—O26—Dy9  | 88.8(2)  |
| O4—Dy5—N6   | 133.1(2) | O41—Dy8—N22 | 78.7(3)  | Dy11—O28—Dy7  | 99.5(2)  |
| O5—Dy5—O4   | 61.6(2)  | O22—Dy9—O26 | 74.3(2)  | Dy7—O29—Dy8   | 90.2(2)  |
| O5—Dy5—N5   | 133.4(2) | O22—Dy9—O31 | 78.6(2)  | Dy9—O31—Dy10  | 89.5(2)  |
| O5—Dy5—N6   | 125.9(2) | O22—Dy9—O32 | 144.2(2) | Dy9—O32—Dy12  | 99.0(2)  |
| O6—Dy5—O4   | 74.3(2)  | O22—Dy9—O33 | 79.1(2)  | Dy9—O33—Dy8   | 90.9(2)  |
| O6—Dy5—O5   | 70.3(2)  | O22—Dy9—O34 | 76.5(2)  | Dy9—O33—Dy12  | 100.1(2) |
| O6—Dy5—N5   | 69.3(2)  | O22—Dy9—O40 | 94.3(3)  | Dy12—O33—Dy8  | 97.2(2)  |
| O6—Dy5—N6   | 151.3(2) | O22—Dy9—N19 | 151.3(2) | Dy8—O34—Dy9   | 91.8(2)  |
| O8—Dy5—O3   | 91.1(2)  | O26—Dy9—N19 | 92.9(3)  | Dy8—O34—Dy12  | 99.2(2)  |
| O8—Dy5—O4   | 74.5(2)  | O31—Dy9—O26 | 68.0(2)  | Dy12—O34—Dy9  | 99.0(3)  |
| O8—Dy5—O5   | 136.1(2) | O31—Dy9—O32 | 136.7(2) | Dy8—O35—Dy12  | 98.9(2)  |
| O8—Dy5—O6   | 100.7(2) | O31—Dy9—O34 | 138.5(2) | Dy8—O36—Dy7   | 89.2(2)  |
